# Supplementary material for: Do Global Cities Enable Global Views? Using Twitter to Quantify the Level of Geographical Awareness of U.S. Cities
Source: PLoS One. 2015 Jul 13;10(7):e0132464. doi: 10.1371/journal.pone.0132464 (PMC4500559; doi:10.1371/journal.pone.0132464)
Supplement: S6 Table — Column A is a list of US city names mentioned by Twitter users living in NY. Column B represents state code where the respective city in column A belongs. Column C represents state name where the respective city in column A belongs. Column D and E represent coordinate of each city. F column shows the population in each city. G column represents the number of tweets mentioned each city. (XLSX) [file pone.0132464.s006.xlsx]

## Sheet: NY
CityName	StateCode	StateName	CityLat	CityLon	Population	tweets
New York City	NY	New York	40.7042	-73.9179	8323732	29269
Newark	NJ	New Jersey	40.7352	-74.1849	283277	7916
Jersey City	NJ	New Jersey	40.7221	-74.0654	246689	2847
Dallas	TX	Texas	32.7995	-96.7872	1259459	2650
Houston	TX	Texas	29.7629	-95.3832	2109413	2541
Kansas City	KS	Kansas	39.1068	-94.6765	142839	2121
Paramus	NJ	New Jersey	40.9471	-74.0705	26809	2024
Washington	DC	District of Columbia	38.9136	-77.0132	591318	1718
Hoboken	NJ	New Jersey	40.7449	-74.0329	43966	1641
Yonkers	NY	New York	40.9415	-73.8644	200288	1557
Atlanta	GA	Georgia	33.7595	-84.4032	463421	1294
Union	NJ	New Jersey	40.697	-74.2704	56214	1091
Wayne	NJ	New Jersey	40.9421	-74.2505	54970	1073
Oklahoma City	OK	Oklahoma	35.4823	-97.535	552556	1067
Miami	FL	Florida	25.7877	-80.2241	384192	1060
Rutherford	NJ	New Jersey	40.8289	-74.1106	18258	1055
Austin	TX	Texas	30.3005	-97.7472	736677	1051
Chicago	IL	Illinois	41.8407	-87.6794	2921775	1025
Elizabeth	NJ	New Jersey	40.6622	-74.2091	128095	934
Paterson	NJ	New Jersey	40.9155	-74.1629	153242	928
Livingston	NJ	New Jersey	40.7887	-74.3213	28545	905
Los Angeles	CA	California	34.0862	-118.376	3908521	896
San Francisco	CA	California	37.7599	-122.437	796417	856
Hackensack	NJ	New Jersey	40.8878	-74.048	44765	824
Orlando	FL	Florida	28.5335	-81.3758	206550	797
Clifton	NJ	New Jersey	40.8679	-74.1545	82384	764
Albany	NY	New York	42.6598	-73.7813	94140	754
Boston	MA	Massachusetts	42.3216	-71.0891	577937	752
Buffalo	NY	New York	42.9047	-78.8494	278865	747
Secaucus	NJ	New Jersey	40.7876	-74.0618	15846	711
Montclair	NJ	New Jersey	40.8222	-74.212	38796	709
Orange	NJ	New Jersey	40.7683	-74.236	32914	702
Denver	CO	Colorado	39.7263	-104.965	578062	650
Woodbridge	NJ	New Jersey	40.5571	-74.2832	19092	629
Garden City	NY	New York	40.7269	-73.6497	21648	621
Syracuse	NY	New York	43.0469	-76.1444	143419	616
Philadelphia	PA	Pennsylvania	39.998	-75.1448	1475892	587
Charlotte	NC	North Carolina	35.2072	-80.8292	631006	556
Ridgewood	NJ	New Jersey	40.984	-74.1144	25077	503
Belleville	NJ	New Jersey	40.7935	-74.1614	35884	467
Columbus	OH	Ohio	39.9898	-82.9915	749160	460
Bayonne	NJ	New Jersey	40.6666	-74.1177	61082	454
Seattle	WA	Washington	47.6264	-122.333	593350	453
Rochester	NY	New York	43.1655	-77.6115	215625	440
Englewood	NJ	New Jersey	40.8933	-73.9758	27383	424
Louisville	KY	Kentucky	38.2289	-85.7495	251318	423
Tampa	FL	Florida	27.9709	-82.4646	337828	410
Summit	NJ	New Jersey	40.7162	-74.3625	21669	404
Portland	OR	Oregon	45.523	-122.64	551302	401
Stamford	CT	Connecticut	41.0744	-73.5413	121991	400
Hempstead	NY	New York	40.705	-73.6174	54324	395
Elmont	NY	New York	40.7016	-73.7025	33135	393
Mamaroneck	NY	New York	40.9491	-73.7335	19516	391
Fort Lee	NJ	New Jersey	40.8499	-73.975	37654	390
Troy	NY	New York	42.7383	-73.6808	48847	378
Westbury	NY	New York	40.7589	-73.5882	14564	377
New Rochelle	NY	New York	40.9286	-73.7842	75404	376
York	PA	Pennsylvania	39.9627	-76.728	42328	373
Las Vegas	NV	Nevada	36.1942	-115.222	568767	372
White Plains	NY	New York	41.0235	-73.7618	56158	359
Detroit	MI	Michigan	42.3871	-83.1026	905161	353
Colorado Springs	CO	Colorado	38.8634	-104.792	397815	345
Raleigh	NC	North Carolina	35.8188	-78.6446	326920	339
Irving	TX	Texas	32.8471	-96.9663	201567	337
San Jose	CA	California	37.3041	-121.873	946979	332
San Antonio	TX	Texas	29.4515	-98.5127	1259735	331
Baltimore	MD	Maryland	39.308	-76.617	627932	329
Richmond	VA	Virginia	37.5383	-77.4615	194320	328
Roosevelt	NY	New York	40.6792	-73.5855	15831	327
Bloomfield	NJ	New Jersey	40.803	-74.189	47978	324
Cleveland	OH	Ohio	41.4823	-81.6697	453382	320
Nashville	TN	Tennessee	36.1548	-86.7621	575052	312
Iselin	NJ	New Jersey	40.5746	-74.3168	17996	312
Phoenix	AZ	Arizona	33.5284	-112.076	1502129	310
Teaneck	NJ	New Jersey	40.891	-74.0112	40110	310
Allentown	PA	Pennsylvania	40.6017	-75.4773	110279	301
Auburn	AL	Alabama	32.5977	-85.4808	48612	285
Westfield	NJ	New Jersey	40.6499	-74.3432	30074	284
Lincoln	NE	Nebraska	40.8099	-96.6753	243824	275
Springfield	NJ	New Jersey	40.7018	-74.3222	15088	273
Passaic	NJ	New Jersey	40.8574	-74.129	70759	273
Durant	OK	Oklahoma	33.9998	-96.3848	13847	272
Greensboro	NC	North Carolina	36.0799	-79.8194	235831	268
Edison	NJ	New Jersey	40.5382	-74.3786	101543	261
Hartford	CT	Connecticut	41.7626	-72.6886	127493	260
Linden	NJ	New Jersey	40.6338	-74.2499	40869	258
West Orange	NJ	New Jersey	40.7887	-74.2554	45756	253
San Diego	CA	California	32.7795	-117.146	1301514	249
Savannah	GA	Georgia	32.0507	-81.1038	133012	246
Rye	NY	New York	40.9705	-73.6884	15651	246
Valley Stream	NY	New York	40.6648	-73.7033	36279	240
New Orleans	LA	Louisiana	29.9728	-90.059	264969	239
University	FL	Florida	28.0696	-82.4371	33230	238
Jacksonville	FL	Florida	30.3194	-81.66	852360	234
Utica	NY	New York	43.0966	-75.2319	59401	233
Atlantic City	NJ	New Jersey	39.365	-74.439	41432	216
Rahway	NJ	New Jersey	40.6071	-74.281	27480	216
Rockville Centre	NY	New York	40.6634	-73.6368	24369	215
Alpharetta	GA	Georgia	34.0733	-84.2811	44798	213
Charleston	SC	South Carolina	32.7893	-79.9863	105731	212
Portland	ME	Maine	43.6651	-70.2691	65935	211
Virginia Beach	VA	Virginia	36.8345	-76.0872	447850	211
Palm Beach	FL	Florida	26.7151	-80.0394	10571	210
Pittsburgh	PA	Pennsylvania	40.4414	-79.9773	318456	204
Minneapolis	MN	Minnesota	44.9645	-93.2682	392618	203
Irvington	NJ	New Jersey	40.7257	-74.2321	60762	202
New Haven	CT	Connecticut	41.3111	-72.9231	127286	202
Mineola	NY	New York	40.7472	-73.6381	19015	198
Cary	NC	North Carolina	35.7789	-78.8002	118643	196
Union City	NJ	New Jersey	40.7677	-74.0318	67118	196
Fair Lawn	NJ	New Jersey	40.9339	-74.1167	32121	195
Trenton	NJ	New Jersey	40.2217	-74.7561	85955	194
Long Beach	NY	New York	40.5882	-73.6681	35228	186
Providence	RI	Rhode Island	41.8236	-71.4221	183731	185
Scarsdale	NY	New York	40.9921	-73.787	17969	183
Memphis	TN	Tennessee	35.1174	-89.9711	646002	180
Oakland	CA	California	37.7952	-122.228	411240	178
Cincinnati	OH	Ohio	39.1362	-84.5031	311487	177
Cranford	NJ	New Jersey	40.6563	-74.3037	22869	177
Uniondale	NY	New York	40.7031	-73.5911	23426	176
Roselle	NJ	New Jersey	40.6535	-74.2606	21948	174
Beacon	NY	New York	41.5042	-73.9656	14685	171
Fulton	NY	New York	43.3199	-76.4132	11785	170
Garfield	NJ	New Jersey	40.8799	-74.1081	30966	167
Danbury	CT	Connecticut	41.4034	-73.4607	81299	165
Lyndhurst	NJ	New Jersey	40.8076	-74.1204	19990	165
Wichita	KS	Kansas	37.6888	-97.3362	351710	162
Princeton	NJ	New Jersey	40.3522	-74.6571	13889	162
Kearny	NJ	New Jersey	40.7631	-74.1372	40300	161
Salt Lake City	UT	Utah	40.7547	-111.893	185364	157
Fort Worth	TX	Texas	32.7389	-97.3338	609154	155
Camden	NJ	New Jersey	39.9372	-75.1062	78045	154
Kingston	NY	New York	41.9289	-74.0041	24248	154
Sacramento	CA	California	38.5556	-121.469	462910	152
Schenectady	NY	New York	42.8041	-73.9293	62289	151
Melville	NY	New York	40.7916	-73.4054	15960	151
Honolulu	HI	Hawaii	21.3058	-157.823	378587	150
Omaha	NE	Nebraska	41.2605	-96.013	394356	149
West New York	NJ	New Jersey	40.7884	-74.0131	46805	148
Norwalk	CT	Connecticut	41.1101	-73.4219	85564	148
Lynbrook	NY	New York	40.6582	-73.6728	19944	147
Ridge	NY	New York	40.9071	-72.8829	15013	147
Oceanside	NY	New York	40.6363	-73.6374	32503	144
St Louis	MO	Missouri	38.6277	-90.2428	344683	140
Milwaukee	WI	Wisconsin	43.0522	-87.9559	586025	138
South Orange	NJ	New Jersey	40.7477	-74.2588	17365	136
Madison	WI	Wisconsin	43.0746	-89.3948	221682	135
Cambridge	MA	Massachusetts	42.3737	-71.1106	103356	135
Amsterdam	NY	New York	42.9434	-74.1903	18034	134
Burlington	VT	Vermont	44.4847	-73.2232	39107	132
Morristown	NJ	New Jersey	40.7989	-74.4785	19429	132
Torrance	CA	California	33.8348	-118.341	143984	131
Boulder	CO	Colorado	40.0194	-105.259	94437	131
Maplewood	NJ	New Jersey	40.7289	-74.2682	23825	131
Texas City	TX	Texas	29.4	-94.9339	45503	129
Mount Vernon	NY	New York	40.9141	-73.8305	70483	128
Birmingham	AL	Alabama	33.5248	-86.8127	234067	127
Franklin Square	NY	New York	40.7017	-73.6765	29328	127
Port Washington	NY	New York	40.8289	-73.6867	15175	126
Anchorage	AK	Alaska	61.1919	-149.762	283369	125
Naples	FL	Florida	26.1529	-81.7985	22222	125
East Orange	NJ	New Jersey	40.7661	-74.2117	70367	123
Irvine	CA	California	33.6841	-117.793	180469	122
Miami Beach	FL	Florida	25.813	-80.1341	92777	121
Columbia	SC	South Carolina	34.0171	-81.0108	117597	121
Lancaster	PA	Pennsylvania	40.0399	-76.3044	57820	121
Millburn	NJ	New Jersey	40.7338	-74.3201	19747	121
Tucson	AZ	Arizona	32.2145	-110.918	526777	120
Clark	NJ	New Jersey	40.6203	-74.3093	14780	119
Bergenfield	NJ	New Jersey	40.9237	-73.9988	27041	119
Norfolk	VA	Virginia	36.8857	-76.2599	237072	117
Iowa City	IA	Iowa	41.6558	-91.525	66177	115
Reno	NV	Nevada	39.5271	-119.822	218593	114
Nutley	NJ	New Jersey	40.8196	-74.1588	27774	113
Huntington	NY	New York	40.8778	-73.4137	18819	113
Indianapolis	IN	Indiana	39.7909	-86.1477	794158	112
Baldwin	NY	New York	40.6633	-73.6106	23315	112
Poughkeepsie	NY	New York	41.7001	-73.9229	31201	111
St Paul	MN	Minnesota	44.9544	-93.1141	291643	109
Plano	TX	Texas	33.0504	-96.7459	269265	108
Durham	NC	North Carolina	35.9886	-78.9072	209858	107
Reading	PA	Pennsylvania	40.3417	-75.9263	84180	107
Tenafly	NJ	New Jersey	40.9221	-73.9638	14000	107
Lodi	NJ	New Jersey	40.878	-74.0827	24799	105
Arlington	TX	Texas	32.705	-97.1228	373933	104
Des Moines	IA	Iowa	41.5909	-93.6209	201257	104
Little Falls	NJ	New Jersey	40.8798	-74.2284	11892	103
Niagara Falls	NY	New York	43.0943	-79.0173	53681	101
Batavia	NY	New York	42.9986	-78.1841	15957	101
Sunnyvale	CA	California	37.372	-122.026	136310	100
Mobile	AL	Alabama	30.6795	-88.1033	197675	100
Kansas City	MO	Missouri	39.0763	-94.5554	456158	99
Hawthorne	NJ	New Jersey	40.9575	-74.1563	18649	99
North Arlington	NJ	New Jersey	40.7913	-74.133	15388	97
Palisades Park	NJ	New Jersey	40.8457	-73.9948	18893	97
Lubbock	TX	Texas	33.5647	-101.878	212642	96
Jackson	MS	Mississippi	32.3204	-90.2044	179637	96
Dayton	OH	Ohio	39.7627	-84.1967	159415	96
Bethlehem	PA	Pennsylvania	40.6262	-75.3757	74580	96
Harrison	NJ	New Jersey	40.746	-74.1551	14515	96
Toledo	OH	Ohio	41.6657	-83.5753	306253	95
New Brunswick	NJ	New Jersey	40.4883	-74.4478	51820	95
Arlington	VA	Virginia	38.8803	-77.1083	203123	95
Westwood	NJ	New Jersey	40.9885	-74.0307	11095	95
Alamo	TX	Texas	26.1851	-98.1179	18575	94
Akron	OH	Ohio	41.0732	-81.5179	211218	94
Port Chester	NY	New York	41.0051	-73.6688	29155	94
Scottsdale	AZ	Arizona	33.5907	-111.896	230627	93
Lafayette	LA	Louisiana	30.2139	-92.0294	113889	93
Lexington	KY	Kentucky	38.0296	-84.4946	280854	93
Ridgefield	NJ	New Jersey	40.8326	-74.005	10924	93
Orange	CA	California	33.8029	-117.833	136557	92
Ewing	NJ	New Jersey	40.26	-74.7888	37624	91
Bethesda	MD	Maryland	38.9847	-77.1131	57809	90
Washington	IN	Indiana	38.6582	-87.1751	11377	89
Westport	CT	Connecticut	41.1387	-73.3524	26321	89
Tempe	AZ	Arizona	33.3887	-111.929	171665	88
Holiday	FL	Florida	28.1839	-82.7429	24801	88
Temple Terrace	FL	Florida	28.0415	-82.3825	22662	88
Anaheim	CA	California	33.8362	-117.89	348374	87
Flint	MI	Michigan	43.0276	-83.694	120781	87
Saddle Brook	NJ	New Jersey	40.9041	-74.0947	13509	87
Bridgeport	CT	Connecticut	41.1886	-73.1959	144359	87
Tulsa	OK	Oklahoma	36.1313	-95.9373	399799	86
Ithaca	NY	New York	42.4436	-76.5001	30157	86
Fort Lauderdale	FL	Florida	26.1358	-80.1418	164054	86
Asbury Park	NJ	New Jersey	40.2224	-74.0121	16907	85
Hasbrouck Heights	NJ	New Jersey	40.8629	-74.0751	11815	85
Babylon	NY	New York	40.6945	-73.3294	12909	84
Brighton	NY	New York	43.1234	-77.5681	35251	83
Tallahassee	FL	Florida	30.4518	-84.2728	165158	83
Somerset	NJ	New Jersey	40.4985	-74.4838	23929	83
Knoxville	TN	Tennessee	35.9729	-83.9422	182782	82
Hillside	NJ	New Jersey	40.6956	-74.2286	22318	82
Asheville	NC	North Carolina	35.5799	-82.5558	72627	81
Middletown	NY	New York	41.4458	-74.4221	27312	81
Harrison	NY	New York	41.007	-73.7181	25362	81
Beverly Hills	CA	California	34.0731	-118.399	35229	80
West Palm Beach	FL	Florida	26.71	-80.0644	97698	80
Long Beach	CA	California	33.8041	-118.158	486861	79
Stony Brook	NY	New York	40.9064	-73.1284	14033	79
Bristol	CT	Connecticut	41.6822	-72.9337	60894	79
Riverside	CA	California	33.9481	-117.396	295730	78
Lansing	MI	Michigan	42.7176	-84.5549	118163	77
Hollywood	FL	Florida	26.0215	-80.1749	148402	77
Santa Monica	CA	California	34.0221	-118.481	89931	76
Clearwater	FL	Florida	27.9736	-82.7643	112394	76
Little Rock	AR	Arkansas	34.736	-92.3311	190640	74
Binghamton	NY	New York	42.1022	-75.9118	46445	74
Sunset	FL	Florida	25.7058	-80.3563	17211	74
Wilmington	DE	Delaware	39.7486	-75.5516	74401	74
West Hempstead	NY	New York	40.6964	-73.6525	18704	74
Pasadena	CA	California	34.1561	-118.132	141020	73
Rome	NY	New York	43.2195	-75.4633	34226	73
Melbourne	FL	Florida	28.115	-80.6319	77587	73
Cedar Grove	NJ	New Jersey	40.8559	-74.229	12528	73
Green Bay	WI	Wisconsin	44.5134	-88.0158	105552	72
Harrisburg	PA	Pennsylvania	40.2698	-76.8756	47826	72
Plainfield	NJ	New Jersey	40.6154	-74.4161	48758	72
New Milford	NJ	New Jersey	40.9362	-74.0188	16590	72
Floral Park	NY	New York	40.7224	-73.7032	15847	72
Berkeley	CA	California	37.8718	-122.275	104341	70
Greenville	SC	South Carolina	34.8443	-82.3854	56353	70
Spokane	WA	Washington	47.6733	-117.41	204529	69
Napa	CA	California	38.3048	-122.299	77223	69
Columbia	MO	Missouri	38.9484	-92.3338	92485	69
Grand Rapids	MI	Michigan	42.9605	-85.6583	202236	69
Elmwood Park	NJ	New Jersey	40.9056	-74.1199	19576	69
Boca Raton	FL	Florida	26.3687	-80.1001	78182	68
Opportunity	WA	Washington	47.647	-117.241	25811	67
Kalamazoo	MI	Michigan	42.2792	-85.5839	76797	67
Ann Arbor	MI	Michigan	42.2745	-83.7393	118788	67
Saratoga Springs	NY	New York	43.0753	-73.7824	28358	67
Athens	GA	Georgia	33.9555	-83.3832	112171	67
Auburn	NY	New York	42.9317	-76.5648	28288	66
Reading	OH	Ohio	39.2227	-84.439	10565	66
Clinton	MD	Maryland	38.7637	-76.8955	28195	66
Newburgh	NY	New York	41.5032	-74.0196	30024	66
Peekskill	NY	New York	41.2889	-73.92	23723	66
Brooklyn	OH	Ohio	41.4354	-81.7445	10955	65
Rockville	MD	Maryland	39.0837	-77.1482	53641	64
Chapel Hill	NC	North Carolina	35.9259	-79.0395	50157	63
Colonia	NJ	New Jersey	40.5914	-74.3143	18203	63
River Edge	NJ	New Jersey	40.9276	-74.0374	11189	63
Tarrytown	NY	New York	41.0691	-73.8598	11373	63
Pleasanton	CA	California	37.6725	-121.883	67471	62
El Paso	TX	Texas	31.7902	-106.423	608849	62
Alexandria	VA	Virginia	38.8162	-77.0713	139748	62
Cliffside Park	NJ	New Jersey	40.8215	-73.9895	23717	62
Santa Clara	CA	California	37.3544	-121.969	109857	61
Chandler	AZ	Arizona	33.2978	-111.864	224641	61
Greece	NY	New York	43.2091	-77.7003	14425	61
Gainesville	FL	Florida	29.6652	-82.3361	100713	61
Green	OH	Ohio	40.9567	-81.4812	24195	60
Columbia	MD	Maryland	39.2036	-76.857	94314	60
Burbank	CA	California	34.1802	-118.328	104845	59
Ridgefield Park	NJ	New Jersey	40.8571	-74.0243	13093	59
Manhattan	KS	Kansas	39.1901	-96.5868	46163	58
Troy	MI	Michigan	42.5801	-83.143	82215	58
Key West	FL	Florida	24.5592	-81.784	25080	58
Chattanooga	TN	Tennessee	35.0455	-85.2673	159189	58
Fairbanks	AK	Alaska	64.8381	-147.726	31053	57
Worcester	MA	Massachusetts	42.2688	-71.8038	181737	57
Fort Myers	FL	Florida	26.6318	-81.8571	55663	57
Freehold	NJ	New Jersey	40.2601	-74.2754	11396	57
Glen Cove	NY	New York	40.8673	-73.6277	26909	57
Plattsburgh	NY	New York	44.6954	-73.4586	19516	56
Montgomery	AL	Alabama	32.3615	-86.2791	199925	56
Columbus	IN	Indiana	39.214	-85.9111	40826	56
Florence	SC	South Carolina	34.1841	-79.7741	31498	56
West Paterson	NJ	New Jersey	40.8937	-74.1989	11486	56
Little Ferry	NJ	New Jersey	40.8493	-74.0409	11039	56
Darien	CT	Connecticut	41.0757	-73.4829	20400	56
Stanford	CA	California	37.4226	-122.165	13784	55
Wilmington	NC	North Carolina	34.2232	-77.9121	86349	55
Richmond	IN	Indiana	39.8302	-84.8907	38424	54
Long Branch	NJ	New Jersey	40.2979	-73.991	31708	54
Glen Rock	NJ	New Jersey	40.9611	-74.1258	11628	54
Islip	NY	New York	40.7378	-73.2195	21075	54
Fort Collins	CO	Colorado	40.5592	-105.078	131684	53
Seminole	FL	Florida	27.8385	-82.7849	11069	53
Gary	IN	Indiana	41.5808	-87.3454	99670	53
Fairview	NJ	New Jersey	40.8167	-74.0008	13922	53
Palo Alto	CA	California	37.4293	-122.138	59659	52
Albuquerque	NM	New Mexico	35.1107	-106.61	503375	52
Spring	TX	Texas	30.0541	-95.387	47722	52
Carteret	NJ	New Jersey	40.5825	-74.23	21639	52
Toms River	NJ	New Jersey	39.9793	-74.1675	92006	52
Lincoln Park	NJ	New Jersey	40.9232	-74.2938	11174	52
Littleton	CO	Colorado	39.5997	-105.011	41765	51
Denton	TX	Texas	33.2163	-97.1292	95249	51
Pensacola	FL	Florida	30.437	-87.2093	55311	51
Newark	CA	California	37.5356	-122.034	43203	50
West Hollywood	CA	California	34.0879	-118.372	37084	50
Sarasota	FL	Florida	27.3373	-82.5353	54879	50
Alsip	IL	Illinois	41.6704	-87.7322	19347	49
Dumont	NJ	New Jersey	40.9452	-73.9934	17664	49
Huntsville	AL	Alabama	34.7123	-86.5963	163588	48
Seymour	IN	Indiana	38.9564	-85.8901	18318	48
Myrtle Beach	SC	South Carolina	33.7042	-78.8755	24023	48
Merrick	NY	New York	40.6595	-73.5536	22604	48
Smithtown	NY	New York	40.8558	-73.2146	27646	48
Malibu	CA	California	34.0305	-118.779	14230	47
Baton Rouge	LA	Louisiana	30.4581	-91.1402	228810	47
Warren	OH	Ohio	41.2382	-80.8146	44538	47
Scranton	PA	Pennsylvania	41.4106	-75.6674	75029	47
Avenel	NJ	New Jersey	40.5827	-74.2798	18036	47
Waterbury	CT	Connecticut	41.556	-73.0383	108503	47
Mesa	AZ	Arizona	33.4112	-111.746	463132	46
Richardson	TX	Texas	32.9656	-96.7157	100516	46
Medford	MA	Massachusetts	42.42	-71.1079	55766	46
Canton	OH	Ohio	40.805	-81.3758	78780	46
Charleston	WV	West Virginia	38.3495	-81.6333	50697	46
Verona	NJ	New Jersey	40.8324	-74.2423	13491	46
Bellmore	NY	New York	40.6612	-73.529	16387	46
Coeur d Alene	ID	Idaho	47.6928	-116.78	42800	45
San Mateo	CA	California	37.5543	-122.313	95136	45
Jackson	TN	Tennessee	35.6331	-88.8208	62766	45
Hillsdale	NJ	New Jersey	41.0074	-74.0425	10185	45
Eastchester	NY	New York	40.9584	-73.8087	18806	45
Hicksville	NY	New York	40.7634	-73.5232	41140	45
Bellevue	WA	Washington	47.5976	-122.159	112833	44
Madison	NJ	New Jersey	40.7588	-74.4161	15854	44
Edina	MN	Minnesota	44.8957	-93.3547	47121	43
Watertown	NY	New York	43.9756	-75.9065	27124	43
Springfield	MA	Massachusetts	42.1124	-72.5475	153670	43
North New Hyde Park	NY	New York	40.7455	-73.6881	14481	43
Fresno	CA	California	36.7815	-119.792	475005	42
Jackson	MI	Michigan	42.2441	-84.4072	36737	42
Williamsport	PA	Pennsylvania	41.2444	-77.0187	30509	42
King of Prussia	PA	Pennsylvania	40.0946	-75.3781	18830	42
Nanuet	NY	New York	41.0953	-74.0156	17298	42
Monterey	CA	California	36.6	-121.891	29649	41
Columbine	CO	Colorado	39.5879	-105.069	24191	41
Taylor	TX	Texas	30.5724	-97.4165	14691	41
Cohoes	NY	New York	42.7733	-73.7031	15688	41
Sunrise	FL	Florida	26.1571	-80.286	91252	41
South Miami	FL	Florida	25.7103	-80.2952	11158	41
Deer Park	NY	New York	40.7607	-73.3301	28787	41
Eugene	OR	Oregon	44.0577	-123.11	145394	40
Dublin	OH	Ohio	40.1093	-83.1402	38887	40
Roanoke	VA	Virginia	37.2769	-79.9557	93048	40
Frederick	MD	Maryland	39.4263	-77.4204	60219	40
Chester	PA	Pennsylvania	39.8471	-75.3727	36612	40
Milford	CT	Connecticut	41.2187	-73.0595	51922	40
Glendale	CA	California	34.1709	-118.25	201400	39
Fargo	ND	North Dakota	46.8714	-96.8087	95660	39
Appleton	WI	Wisconsin	44.2655	-88.4017	72161	39
Bangor	ME	Maine	44.8109	-68.783	31685	39
Delray Beach	FL	Florida	26.4591	-80.083	65093	39
Bloomington	IN	Indiana	39.1621	-86.529	72446	39
Marysville	OH	Ohio	40.2339	-83.3664	19457	39
Middlesex	NJ	New Jersey	40.5746	-74.5019	13991	39
Dobbs Ferry	NY	New York	41.0127	-73.866	11070	39
Orange	CT	Connecticut	41.2795	-73.0254	14193	39
Patchogue	NY	New York	40.7634	-73.0179	12232	39
Glens Falls	NY	New York	43.3121	-73.6482	14339	38
Franklin	TN	Tennessee	35.9291	-86.8574	48871	38
Champaign	IL	Illinois	40.113	-88.2612	70918	38
McLean	VA	Virginia	38.9283	-77.1754	39893	38
Dover	DE	Delaware	39.1619	-75.5268	34999	38
Lakewood	NJ	New Jersey	40.0964	-74.2163	41774	38
Ramsey	NJ	New Jersey	41.0588	-74.1424	14610	38
Santa Barbara	CA	California	34.4258	-119.714	91896	37
Frisco	TX	Texas	33.1413	-96.8131	83341	37
Orange	TX	Texas	30.1092	-93.7591	18077	37
Anderson	IN	Indiana	40.1	-85.6815	58467	37
Wilson	NC	North Carolina	35.7311	-77.9235	47132	37
Tinton Falls	NJ	New Jersey	40.278	-74.0897	16909	37
Wyckoff	NJ	New Jersey	40.9986	-74.1671	16835	37
Gilbert	AZ	Arizona	33.3444	-111.762	149301	36
Aurora	CO	Colorado	39.6959	-104.808	301016	36
Grand Island	NE	Nebraska	40.9223	-98.358	44729	36
St Petersburg	FL	Florida	27.7823	-82.6676	249079	36
Madison	IN	Indiana	38.7501	-85.3954	12343	36
Fort Wayne	IN	Indiana	41.0783	-85.1265	205348	36
Perth Amboy	NJ	New Jersey	40.5195	-74.2753	48923	36
Redmond	WA	Washington	47.6694	-122.124	47777	35
Mountain View	CA	California	37.3926	-122.082	72982	35
Sedona	AZ	Arizona	34.8599	-111.789	11791	35
Santa Fe	NM	New Mexico	35.6672	-105.965	68975	35
Cheektowaga	NY	New York	42.912	-78.7597	78201	35
Tacoma	WA	Washington	47.2414	-122.459	199437	34
Spring Valley	NY	New York	41.1144	-74.0478	26759	34
Medford	OR	Oregon	42.332	-122.862	70077	33
San Bernardino	CA	California	34.1295	-117.293	207172	33
Allen	TX	Texas	33.0997	-96.6629	70187	33
Rockford	IL	Illinois	42.2698	-89.0698	152547	33
Geneva	NY	New York	42.8696	-76.9888	13698	33
Herndon	VA	Virginia	38.9715	-77.3887	23353	33
Wilkes Barre	PA	Pennsylvania	41.2446	-75.8779	41387	33
East Rockaway	NY	New York	40.6437	-73.6669	10302	33
Freeport	NY	New York	40.6539	-73.587	44324	33
Plainview	NY	New York	40.7799	-73.4795	26031	33
Newport	RI	Rhode Island	41.488	-71.3126	25786	33
Redwood City	CA	California	37.4829	-122.236	76716	32
Davis	CA	California	38.5539	-121.738	64252	32
Santa Ana	CA	California	33.7407	-117.881	346599	32
Topeka	KS	Kansas	39.0392	-95.6895	122212	32
Lawrence	KS	Kansas	38.9599	-95.2532	85395	32
Oneonta	NY	New York	42.456	-75.0623	13956	32
Ocala	FL	Florida	29.1877	-82.1306	51868	32
Hershey	PA	Pennsylvania	40.2784	-76.6512	13055	32
Levittown	NY	New York	40.7245	-73.5112	52751	32
Holtsville	NY	New York	40.8134	-73.0472	18700	32
Santa Cruz	CA	California	36.9721	-122.026	55785	31
Lancaster	CA	California	34.687	-118.154	143887	31
Palm Springs	CA	California	33.824	-116.53	49667	31
Tyler	TX	Texas	32.3342	-95.2999	90776	31
Billings	MT	Montana	45.7866	-108.537	96468	31
Hamburg	NY	New York	42.7228	-78.8339	9813	31
Tonawanda	NY	New York	43.0112	-78.8774	15602	31
Tonawanda	NY	New York	42.9853	-78.8521	59563	31
Manchester	NH	New Hampshire	42.9863	-71.4516	113964	31
Clinton	IA	Iowa	41.8469	-90.2073	27063	31
Washington	PA	Pennsylvania	40.175	-80.2506	14847	31
Augusta	GA	Georgia	33.4333	-82.022	195696	31
Fairfax	VA	Virginia	38.8526	-77.3044	22823	31
Sayreville	NJ	New Jersey	40.4658	-74.324	43828	31
Massapequa	NY	New York	40.6704	-73.4711	22422	31
Lindenhurst	NY	New York	40.6854	-73.3722	28376	31
Kailua	HI	Hawaii	21.3942	-157.737	36128	30
Vancouver	WA	Washington	45.6337	-122.603	163464	30
Duluth	MN	Minnesota	46.7804	-92.1171	86957	30
Columbus	GA	Georgia	32.4896	-84.9404	187624	30
Sunbury	PA	Pennsylvania	40.8639	-76.7892	10270	30
Annapolis	MD	Maryland	38.9729	-76.5012	37535	30
Ronkonkoma	NY	New York	40.814	-73.1284	20681	30
Englewood	CO	Colorado	39.6468	-104.992	31115	29
Galveston	TX	Texas	29.2811	-94.8259	60503	29
Erie	PA	Pennsylvania	42.1145	-80.0762	101442	29
East Lansing	MI	Michigan	42.7404	-84.4817	48622	29
Northampton	MA	Massachusetts	42.3274	-72.6577	29000	29
Portsmouth	NH	New Hampshire	43.067	-70.7728	21450	29
Peoria	IL	Illinois	40.7207	-89.6094	113121	29
Normal	IL	Illinois	40.5122	-88.9887	49342	29
Fayetteville	NC	North Carolina	35.0667	-78.9176	119208	29
Reston	VA	Virginia	38.9546	-77.3464	59949	29
Miami	OK	Oklahoma	36.8835	-94.876	13905	28
Overland Park	KS	Kansas	38.9401	-94.6807	174706	28
Ames	IA	Iowa	42.0273	-93.6316	55463	28
Paris	TX	Texas	33.6625	-95.5477	26696	28
Kissimmee	FL	Florida	28.304	-81.4129	62558	28
Macon	GA	Georgia	32.8348	-83.6517	94694	28
Concord	NC	North Carolina	35.4043	-80.6005	65179	28
Dover	NJ	New Jersey	40.8859	-74.5582	19110	28
South Plainfield	NJ	New Jersey	40.5807	-74.414	23876	28
Red Bank	NJ	New Jersey	40.3475	-74.0671	11961	28
Woodmere	NY	New York	40.6362	-73.7195	16532	28
West Babylon	NY	New York	40.7134	-73.3571	44676	28
Shirley	NY	New York	40.7969	-72.871	27493	28
Springfield	MO	Missouri	37.1951	-93.2862	153889	27
McAllen	TX	Texas	26.2163	-98.2364	130054	27
Helena	MT	Montana	46.5958	-112.027	26007	27
Jamestown	NY	New York	42.0955	-79.2386	30726	27
Oswego	NY	New York	43.4546	-76.5066	18355	27
Brookline	MA	Massachusetts	42.3307	-71.1336	58378	27
Newton	MA	Massachusetts	42.3377	-71.2099	84184	27
Davenport	IA	Iowa	41.543	-90.5907	100227	27
Winder	GA	Georgia	33.9965	-83.7209	13600	27
West Caldwell	NJ	New Jersey	40.8483	-74.289	11258	27
Brentwood	NY	New York	40.7818	-73.2441	56915	27
Stockton	CA	California	37.9756	-121.301	293097	26
Walnut	CA	California	34.0277	-117.861	31514	26
Joplin	MO	Missouri	37.0778	-94.511	46728	26
Edinburg	TX	Texas	26.3042	-98.1638	61191	26
Minnetonka	MN	Minnesota	44.932	-93.4616	51304	26
Farmington	MI	Michigan	42.4619	-83.375	10374	26
Southfield	MI	Michigan	42.4796	-83.245	78925	26
Gloversville	NY	New York	43.0525	-74.3428	15315	26
Newport News	VA	Virginia	37.071	-76.4846	182973	26
Bend	OR	Oregon	44.0564	-121.308	72852	25
Laguna	CA	California	38.4239	-121.427	43758	25
Henderson	NV	Nevada	36.0292	-115.025	248849	25
Golden	CO	Colorado	39.7468	-105.211	17963	25
Canyon	TX	Texas	34.9793	-101.926	12817	25
Temple	TX	Texas	31.0937	-97.3622	57618	25
Shreveport	LA	Louisiana	32.468	-93.7711	200925	25
Katy	TX	Texas	29.7926	-95.8224	13877	25
Casper	WY	Wyoming	42.8347	-106.325	52143	25
Stuart	FL	Florida	27.1922	-80.243	15762	25
Laurel	MS	Mississippi	31.6974	-89.1393	18470	25
Granger	IN	Indiana	41.7383	-86.1488	30321	25
Youngstown	OH	Ohio	41.0963	-80.6493	78948	25
Lynchburg	VA	Virginia	37.4037	-79.1702	69146	25
Carlisle	PA	Pennsylvania	40.2026	-77.195	18507	25
Hampton	VA	Virginia	37.0349	-76.3601	146993	25
Old Bridge	NJ	New Jersey	40.3977	-74.3343	25076	25
Roselle Park	NJ	New Jersey	40.6654	-74.2687	13413	25
Suffern	NY	New York	41.1118	-74.1458	11127	25
Ossining	NY	New York	41.1651	-73.8567	24995	25
Oregon City	OR	Oregon	45.3474	-122.598	28844	24
Walnut Creek	CA	California	37.91	-122.047	65829	24
South San Francisco	CA	California	37.656	-122.426	62754	24
Carlsbad	CA	California	33.122	-117.297	95925	24
Glendale	AZ	Arizona	33.5807	-112.199	246017	24
Eau Claire	WI	Wisconsin	44.8146	-91.4927	63906	24
Wisconsin Rapids	WI	Wisconsin	44.3868	-89.8231	18157	24
Auburn Hills	MI	Michigan	42.6618	-83.2431	21249	24
Daytona Beach	FL	Florida	29.2073	-81.0379	66957	24
Bradenton	FL	Florida	27.4882	-82.5777	54658	24
Charlottesville	VA	Virginia	38.0345	-78.4865	40683	24
Easton	PA	Pennsylvania	40.6882	-75.2165	26952	24
Williamsburg	VA	Virginia	37.2749	-76.7083	13149	24
East Meadow	NY	New York	40.7137	-73.5558	37319	24
Garland	TX	Texas	32.9073	-96.6352	225018	23
Corpus Christi	TX	Texas	27.7429	-97.4019	293505	23
The Woodlands	TX	Texas	30.1774	-95.5038	65067	23
Corning	NY	New York	42.1481	-77.057	10573	23
Waltham	MA	Massachusetts	42.3806	-71.235	60430	23
Panama City	FL	Florida	30.1745	-85.6645	38537	23
Washington	OH	Ohio	39.5363	-83.4356	13988	23
Winston Salem	NC	North Carolina	36.1028	-80.2605	200867	23
Mooresville	NC	North Carolina	35.5843	-80.8201	24788	23
Newark	DE	Delaware	39.6791	-75.758	29858	23
Monsey	NY	New York	41.1195	-74.066	14949	23
Pearl River	NY	New York	41.064	-74.0103	15679	23
Wantagh	NY	New York	40.6747	-73.5105	18892	23
Trumbull	CT	Connecticut	41.2561	-73.2123	35996	23
Bay Shore	NY	New York	40.7299	-73.2537	24839	23
Milpitas	CA	California	37.4346	-121.895	66520	22
Paradise	CA	California	39.7617	-121.609	27307	22
Rancho Cucamonga	CA	California	34.1233	-117.579	168703	22
Ontario	CA	California	34.0528	-117.628	173100	22
Corona	CA	California	33.87	-117.568	150579	22
Roswell	NM	New Mexico	33.3872	-104.528	45406	22
Rotterdam	NY	New York	42.7828	-73.9573	20939	22
Salem	MA	Massachusetts	42.5168	-70.8985	41797	22
Aventura	FL	Florida	25.9643	-80.1358	30886	22
Evanston	IL	Illinois	42.0464	-87.6946	73919	22
Aiken	SC	South Carolina	33.5494	-81.7207	27510	22
Scotch Plains	NJ	New Jersey	40.6383	-74.3739	23476	22
Bethpage	NY	New York	40.7467	-73.4843	16664	22
Stratford	CT	Connecticut	41.2016	-73.1342	50959	22
Salem	OR	Oregon	44.9311	-123.029	152039	21
Goodyear	AZ	Arizona	33.3897	-112.399	49833	21
Brownwood	TX	Texas	31.7079	-98.9824	19060	21
Cedar Rapids	IA	Iowa	41.9831	-91.6685	126197	21
Eagan	MN	Minnesota	44.8138	-93.1691	68922	21
Brunswick	ME	Maine	43.913	-69.9536	15736	21
Lockport	NY	New York	43.1698	-78.691	21515	21
Canandaigua	NY	New York	42.8861	-77.2817	11613	21
Winter Park	FL	Florida	28.5962	-81.3465	24553	21
Lakeland	FL	Florida	28.0412	-81.959	85232	21
Effingham	IL	Illinois	39.1209	-88.5459	12120	21
Springfield	IL	Illinois	39.7833	-89.6504	112701	21
Franklin	IN	Indiana	39.4896	-86.0568	22687	21
Oregon	OH	Ohio	41.6491	-83.4615	19569	21
Kent	OH	Ohio	41.1504	-81.3611	28845	21
Marietta	GA	Georgia	33.9534	-84.5406	65440	21
Sandy Springs	GA	Georgia	33.9374	-84.3686	96707	21
Chesapeake	VA	Virginia	36.7674	-76.2874	223419	21
Silver Spring	MD	Maryland	39.0042	-77.019	80336	21
SeaTac	WA	Washington	47.4414	-122.293	27139	20
Newport Beach	CA	California	33.6167	-117.898	75208	20
Carson	CA	California	33.8397	-118.26	96313	20
Bakersfield	CA	California	35.3573	-119.032	299952	20
Provo	UT	Utah	40.2444	-111.661	116515	20
Pueblo	CO	Colorado	38.2669	-104.62	107075	20
Bozeman	MT	Montana	45.6779	-111.047	32273	20
Idaho Falls	ID	Idaho	43.4918	-112.033	53683	20
Waukesha	WI	Wisconsin	43.0099	-88.2374	67634	20
Augusta	ME	Maine	44.3235	-69.7653	18979	20
Lowell	MA	Massachusetts	42.6395	-71.3146	106600	20
Quincy	MA	Massachusetts	42.2606	-71.0059	90411	20
Largo	FL	Florida	27.9084	-82.7778	70667	20
Jupiter	FL	Florida	26.926	-80.105	51954	20
Coral Gables	FL	Florida	25.7282	-80.271	44500	20
Tuscaloosa	AL	Alabama	33.2065	-87.5346	78042	20
Naperville	IL	Illinois	41.7498	-88.1557	151586	20
South Bend	IN	Indiana	41.6726	-86.2552	106669	20
Evansville	IN	Indiana	37.9772	-87.5506	118683	20
Hilliard	OH	Ohio	40.0343	-83.1427	26321	20
Newark	OH	Ohio	40.063	-82.4168	47522	20
Decatur	GA	Georgia	33.7714	-84.2977	18512	20
Wake Forest	NC	North Carolina	35.9733	-78.5188	22324	20
West Chester	PA	Pennsylvania	39.9587	-75.6051	18678	20
Hilo	HI	Hawaii	19.7025	-155.083	45567	19
Folsom	CA	California	38.6721	-121.158	70673	19
Ventura	CA	California	34.2752	-119.228	107928	19
Roseville	CA	California	38.7524	-121.289	112025	19
Vista	CA	California	33.1935	-117.241	97843	19
Downey	CA	California	33.9382	-118.131	113566	19
Baldwin Park	CA	California	34.0828	-117.972	78402	19
Citrus	CA	California	34.1149	-117.892	11049	19
Flagstaff	AZ	Arizona	35.1992	-111.631	58514	19
Loveland	CO	Colorado	40.4048	-105.086	57097	19
Amarillo	TX	Texas	35.1993	-101.845	183256	19
Moore	OK	Oklahoma	35.3388	-97.4876	48619	19
Lewisville	TX	Texas	33.0383	-97.0062	94690	19
Williston	ND	North Dakota	48.1565	-103.628	12198	19
Mequon	WI	Wisconsin	43.2242	-87.9601	23562	19
Somerville	MA	Massachusetts	42.3905	-71.1037	78688	19
Oxford	MS	Mississippi	34.3598	-89.5262	13030	19
Marathon	FL	Florida	24.7263	-81.0403	10012	19
Slidell	LA	Louisiana	30.279	-89.7777	26193	19
Port Orange	FL	Florida	29.119	-81.0029	53322	19
Beachwood	OH	Ohio	41.4822	-81.504	11785	19
Mount Pleasant	SC	South Carolina	32.8232	-79.8455	61721	19
Guttenberg	NJ	New Jersey	40.7938	-74.0065	10886	19
Hillsboro	OR	Oregon	45.5238	-122.943	85011	18
Inglewood	CA	California	33.9575	-118.346	117261	18
Westminster	CO	Colorado	39.8734	-105.057	106900	18
Midland	TX	Texas	32.0051	-102.099	99785	18
Kilgore	TX	Texas	32.3855	-94.8685	11462	18
Pocatello	ID	Idaho	42.8752	-112.447	52961	18
Dubuque	IA	Iowa	42.5043	-90.6869	58399	18
Canton	MI	Michigan	42.3125	-83.4751	85047	18
Elmira	NY	New York	42.0899	-76.8096	29873	18
Pittsfield	MA	Massachusetts	42.4522	-73.2515	45031	18
Madison	AL	Alabama	34.7151	-86.7396	35967	18
Lafayette	IN	Indiana	40.4106	-86.8747	58037	18
Mason	OH	Ohio	39.358	-84.3118	31291	18
Athens	OH	Ohio	39.3294	-82.0962	21008	18
State College	PA	Pennsylvania	40.7913	-77.8587	40034	18
Marlton	NJ	New Jersey	39.8989	-74.9275	10534	18
Westerly	RI	Rhode Island	41.3748	-71.8187	18341	18
Pawtucket	RI	Rhode Island	41.8755	-71.376	74309	18
Missoula	MT	Montana	46.8626	-114.012	61464	17
Auburn	CA	California	38.8987	-121.074	12982	17
San Juan Capistrano	CA	California	33.4995	-117.662	62820	17
Culver City	CA	California	34.0078	-118.401	40330	17
Hermosa Beach	CA	California	33.8663	-118.4	19292	17
Mesquite	TX	Texas	32.7829	-96.6099	133486	17
Monroe	LA	Louisiana	32.5103	-92.0949	52155	17
Hope	AR	Arkansas	33.6678	-93.5899	10769	17
Oneida	NY	New York	43.085	-75.6534	10827	17
Cocoa	FL	Florida	28.3693	-80.7438	16889	17
Columbia	TN	Tennessee	35.615	-87.0445	37036	17
Steubenville	OH	Ohio	40.3655	-80.6315	18529	17
Spartanburg	SC	South Carolina	34.9468	-81.9276	38904	17
High Point	NC	North Carolina	35.9705	-79.9975	93436	17
Fredericksburg	VA	Virginia	38.3018	-77.4708	21099	17
Vienna	VA	Virginia	38.8992	-77.2607	14389	17
New London	CT	Connecticut	41.3525	-72.1034	26658	17
Riverhead	NY	New York	40.9284	-72.6622	12079	17
Meriden	CT	Connecticut	41.533	-72.7996	59029	17
Middletown	CT	Connecticut	41.5537	-72.6632	47149	17
St George	UT	Utah	37.0953	-113.578	72459	16
Visalia	CA	California	36.3241	-119.307	111438	16
Stillwater	OK	Oklahoma	36.1215	-97.0685	43272	16
Killeen	TX	Texas	31.1056	-97.7266	106210	16
Jefferson City	MO	Missouri	38.573	-92.1893	38718	16
McKinney	TX	Texas	33.1972	-96.6398	106767	16
Longview	TX	Texas	32.5091	-94.7539	76831	16
Bryan	TX	Texas	30.6655	-96.3667	69277	16
Eden Prairie	MN	Minnesota	44.8537	-93.4608	60078	16
Apple Valley	MN	Minnesota	44.744	-93.2062	52453	16
Traverse City	MI	Michigan	44.7601	-85.6123	15705	16
Saginaw	MI	Michigan	43.4209	-83.9508	59615	16
Livonia	MI	Michigan	42.3951	-83.3656	96875	16
Wayne	MI	Michigan	42.2782	-83.3787	18540	16
Keene	NH	New Hampshire	42.9425	-72.2884	23334	16
Burlington	MA	Massachusetts	42.5064	-71.2001	23197	16
Framingham	MA	Massachusetts	42.2998	-71.4266	67491	16
Clemson	SC	South Carolina	34.6849	-82.8148	12466	16
Carrboro	NC	North Carolina	35.9204	-79.0839	17221	16
Falls Church	VA	Virginia	38.8845	-77.1762	10655	16
Morgantown	WV	West Virginia	39.6337	-79.9507	27789	16
Arlington	NY	New York	41.6949	-73.8921	13756	16
Syosset	NY	New York	40.8127	-73.5009	18418	16
Jericho	NY	New York	40.7865	-73.5368	13663	16
Shelton	CT	Connecticut	41.3064	-73.1292	39852	16
Sparks	NV	Nevada	39.5545	-119.736	81231	15
Manteca	CA	California	37.8028	-121.221	60705	15
Bell	CA	California	33.9784	-118.183	38548	15
Commerce	CA	California	34.0006	-118.155	12951	15
Carrollton	TX	Texas	32.9901	-96.8933	122174	15
Quincy	IL	Illinois	39.9323	-91.3887	39853	15
Bentonville	AR	Arkansas	36.3667	-94.2134	28357	15
Beaumont	TX	Texas	30.0799	-94.1267	115472	15
Butte	MT	Montana	45.9609	-112.563	32427	15
Bismarck	ND	North Dakota	46.8133	-100.779	59344	15
Mankato	MN	Minnesota	44.1645	-93.9938	35412	15
Dearborn	MI	Michigan	42.3146	-83.2166	95888	15
Pontiac	MI	Michigan	42.646	-83.2926	67873	15
Holyoke	MA	Massachusetts	42.2032	-72.624	40032	15
Lawrence	MA	Massachusetts	42.7037	-71.163	74811	15
Marco Island	FL	Florida	25.9406	-81.7148	17733	15
Lake Worth	FL	Florida	26.6197	-80.0587	37184	15
Washington	IL	Illinois	40.7039	-89.4206	11973	15
Lincoln	IL	Illinois	40.1499	-89.3675	15201	15
Elgin	IL	Illinois	42.0394	-88.2886	106628	15
Lawrence	IN	Indiana	39.8627	-85.9943	42356	15
Franklin	OH	Ohio	39.5613	-84.3016	12625	15
Auburn	IN	Indiana	41.3655	-85.0564	12545	15
Bellingham	WA	Washington	48.7502	-122.475	76336	14
Bothell	WA	Washington	47.7717	-122.204	33291	14
Richmond	CA	California	37.9369	-122.342	105522	14
Woodland	CA	California	38.6741	-121.772	55474	14
Costa Mesa	CA	California	33.665	-117.912	114513	14
Laguna Beach	CA	California	33.5315	-117.769	27549	14
Coachella	CA	California	33.6795	-116.174	31603	14
Surprise	AZ	Arizona	33.6518	-112.397	80263	14
Greenwood Village	CO	Colorado	39.6159	-104.911	13636	14
Norman	OK	Oklahoma	35.2216	-97.4182	104055	14
Edmond	OK	Oklahoma	35.6572	-97.4649	78795	14
College Station	TX	Texas	30.6014	-96.3145	76850	14
Baytown	TX	Texas	29.7438	-94.9658	72565	14
Rochester	MN	Minnesota	44.0258	-92.4732	98280	14
St Cloud	MN	Minnesota	45.5568	-94.1725	65779	14
Bloomington	MN	Minnesota	44.8337	-93.31	84608	14
Racine	WI	Wisconsin	42.7261	-87.8059	81276	14
Libertyville	IL	Illinois	42.2842	-87.9607	23137	14
Holland	MI	Michigan	42.777	-86.1066	36750	14
Tupelo	MS	Mississippi	34.2596	-88.7259	35188	14
St Augustine	FL	Florida	29.8943	-81.3132	13530	14
Wellington	FL	Florida	26.6551	-80.2541	49243	14
Joliet	IL	Illinois	41.533	-88.1089	137417	14
Oak Lawn	IL	Illinois	41.7151	-87.7534	53770	14
Lima	OH	Ohio	40.7407	-84.115	38875	14
Manassas	VA	Virginia	38.7514	-77.4764	37862	14
Towson	MD	Maryland	39.393	-76.6096	53412	14
Hopatcong	NJ	New Jersey	40.9387	-74.6645	16319	14
College Park	MD	Maryland	38.9966	-76.9275	25324	14
Arnold	MD	Maryland	39.0473	-76.4966	23580	14
Eatontown	NJ	New Jersey	40.2936	-74.0567	14156	14
Wallington	NJ	New Jersey	40.8529	-74.1093	11953	14
Huntington Station	NY	New York	40.8447	-73.4074	31250	14
West Hartford	CT	Connecticut	41.7601	-72.743	61935	14
North Haven	CT	Connecticut	41.3807	-72.8607	24538	14
Fall River	MA	Massachusetts	41.6981	-71.147	92864	14
Silverdale	WA	Washington	47.6594	-122.677	16260	13
Mount Vernon	WA	Washington	48.4201	-122.326	29839	13
Olympia	WA	Washington	47.0424	-122.893	45523	13
Chico	CA	California	39.74	-121.835	67031	13
Marina	CA	California	36.6782	-121.797	19051	13
Galt	CA	California	38.2608	-121.303	23272	13
Temecula	CA	California	33.5033	-117.124	91161	13
Calabasas	CA	California	34.1384	-118.661	22721	13
Compton	CA	California	33.8967	-118.225	98430	13
Cypress	CA	California	33.8183	-118.039	48253	13
Huntington Beach	CA	California	33.6929	-118	199262	13
Apple Valley	CA	California	34.5115	-117.212	67710	13
Redlands	CA	California	34.0566	-117.171	71165	13
Logan	UT	Utah	41.7379	-111.831	48486	13
Parker	CO	Colorado	39.5195	-104.766	35971	13
Odessa	TX	Texas	31.8633	-102.365	93741	13
Flower Mound	TX	Texas	33.0317	-97.0788	63844	13
Mansfield	TX	Texas	32.5771	-97.1267	48251	13
Waco	TX	Texas	31.5515	-97.1559	120151	13
Battle Creek	MI	Michigan	42.3121	-85.204	53643	13
Romulus	MI	Michigan	42.234	-83.3716	24068	13
Kenmore	NY	New York	42.9649	-78.8717	15872	13
Watervliet	NY	New York	42.7246	-73.7062	10177	13
Nashua	NH	New Hampshire	42.751	-71.4808	91087	13
Margate	FL	Florida	26.2463	-80.2123	57297	13
Hialeah	FL	Florida	25.8605	-80.294	231667	13
Clinton	MS	Mississippi	32.3395	-90.323	23837	13
Bloomington	IL	Illinois	40.4776	-88.9835	73840	13
Skokie	IL	Illinois	42.037	-87.7401	63391	13
Worthington	OH	Ohio	40.0915	-83.0209	13787	13
Mansfield	OH	Ohio	40.7549	-82.5229	49847	13
Conyers	GA	Georgia	33.6664	-84.0076	12396	13
Albany	GA	Georgia	31.5823	-84.1656	76687	13
Greenville	NC	North Carolina	35.6016	-77.3724	68795	13
Suffolk	VA	Virginia	36.7413	-76.6099	84197	13
Torrington	CT	Connecticut	41.8175	-73.1187	36272	13
Hauppauge	NY	New York	40.8182	-73.2069	20895	13
Ashland	OR	Oregon	42.1914	-122.701	21608	12
Corvallis	OR	Oregon	44.5708	-123.276	51828	12
Puyallup	WA	Washington	47.1849	-122.292	35492	12
Beaverton	OR	Oregon	45.4797	-122.81	87184	12
Wenatchee	WA	Washington	47.4233	-120.325	30059	12
Eureka	CA	California	40.79	-124.163	26807	12
Santa Rosa	CA	California	38.4486	-122.705	156790	12
Belmont	CA	California	37.5181	-122.292	25258	12
San Ramon	CA	California	37.7574	-121.952	51225	12
Fremont	CA	California	37.5429	-121.983	208475	12
Aliso Viejo	CA	California	33.5751	-117.725	45221	12
Coronado	CA	California	32.6782	-117.173	24943	12
Solana Beach	CA	California	32.9954	-117.26	12915	12
San Fernando	CA	California	34.2873	-118.439	25015	12
El Segundo	CA	California	33.9213	-118.406	16661	12
Palm Desert	CA	California	33.7255	-116.369	48532	12
Casa Grande	AZ	Arizona	32.886	-111.744	27805	12
Longmont	CO	Colorado	40.1716	-105.109	80254	12
Greeley	CO	Colorado	40.4151	-104.724	96400	12
The Colony	TX	Texas	33.0909	-96.8847	39198	12
West Des Moines	IA	Iowa	41.5737	-93.7504	52587	12
Lockhart	TX	Texas	29.8819	-97.676	12801	12
Laredo	TX	Texas	27.5244	-99.4906	221903	12
Mission	TX	Texas	26.2114	-98.3213	67993	12
Dickinson	TX	Texas	29.4605	-95.0539	21301	12
Sioux Falls	SD	South Dakota	43.5363	-96.7318	144946	12
Marquette	MI	Michigan	46.5486	-87.4024	20422	12
Deerfield	IL	Illinois	42.1683	-87.8513	19128	12
Northbrook	IL	Illinois	42.1292	-87.8407	33334	12
Taylor	MI	Michigan	42.2318	-83.2648	63981	12
Farmington Hills	MI	Michigan	42.4861	-83.3755	81605	12
Lancaster	NY	New York	42.9004	-78.673	10801	12
Destin	FL	Florida	30.3934	-86.4753	17302	12
Valdosta	GA	Georgia	30.8467	-83.2831	46386	12
Cocoa Beach	FL	Florida	28.331	-80.613	12812	12
Brandon	FL	Florida	27.9347	-82.2891	97853	12
Brentwood	TN	Tennessee	35.9982	-86.7926	27100	12
Mount Vernon	IL	Illinois	38.3135	-88.9082	16054	12
Greenwood	IN	Indiana	39.6113	-86.1181	41999	12
Delaware	OH	Ohio	40.2989	-83.072	33006	12
Hudson	OH	Ohio	41.2434	-81.439	22678	12
New Bern	NC	North Carolina	35.1091	-77.0691	23721	12
Hackettstown	NJ	New Jersey	40.8532	-74.8294	9409	12
East Brunswick	NJ	New Jersey	40.4342	-74.405	48846	12
North Brunswick	NJ	New Jersey	40.4525	-74.4766	39795	12
Somerville	NJ	New Jersey	40.5708	-74.6053	12838	12
Portsmouth	VA	Virginia	36.8313	-76.3456	100676	12
Oakland	NJ	New Jersey	41.0289	-74.2373	13177	12
North Bellmore	NY	New York	40.6895	-73.5379	20002	12
St James	NY	New York	40.8772	-73.1553	13614	12
Juneau	AK	Alaska	58.3514	-134.512	31592	11
Arlington	WA	Washington	48.1811	-122.139	15028	11
Carson	NV	Nevada	39.1609	-119.754	56641	11
Modesto	CA	California	37.6615	-120.995	211551	11
Vineyard	CA	California	38.4645	-121.347	18436	11
Chula Vista	CA	California	32.6279	-117.048	222892	11
Rosemead	CA	California	34.0704	-118.082	55819	11
Ogden	UT	Utah	41.2277	-111.961	83024	11
Cheyenne	WY	Wyoming	41.1455	-104.802	54750	11
Enid	OK	Oklahoma	36.4006	-97.8808	47135	11
Hutchinson	KS	Kansas	38.0655	-97.9235	40045	11
Independence	MO	Missouri	39.0798	-94.4066	114597	11
Fremont	NE	Nebraska	41.4397	-96.4899	25735	11
Fayetteville	AR	Arkansas	36.0764	-94.1609	71431	11
Pasadena	TX	Texas	29.6762	-95.1738	149734	11
Austin	MN	Minnesota	43.6678	-92.978	23576	11
Muskegon	MI	Michigan	43.2266	-86.2477	40259	11
Royal Oak	MI	Michigan	42.5046	-83.1506	59575	11
South Burlington	VT	Vermont	44.4518	-73.1817	17783	11
Rutland	VT	Vermont	43.6077	-72.9741	17235	11
Metairie	LA	Louisiana	29.9978	-90.1775	137795	11
Port Charlotte	FL	Florida	26.9902	-82.1058	51276	11
Martin	TN	Tennessee	36.3418	-88.8516	10289	11
Orland Park	IL	Illinois	41.6116	-87.8543	54680	11
Carmel	IN	Indiana	39.9729	-86.1079	46789	11
Troy	OH	Ohio	40.0416	-84.2086	22791	11
Hamilton	OH	Ohio	39.3958	-84.5649	62484	11
Medina	OH	Ohio	41.1359	-81.8641	29303	11
Sharon	PA	Pennsylvania	41.2301	-80.499	15808	11
Blacksburg	VA	Virginia	37.2299	-80.4177	41000	11
Rock Hill	SC	South Carolina	34.9381	-81.0261	57672	11
Dothan	AL	Alabama	31.2272	-85.4073	62820	11
Roswell	GA	Georgia	34.0339	-84.344	90351	11
Johnson City	TN	Tennessee	36.3354	-82.3728	58564	11
Bowie	MD	Maryland	38.9647	-76.7445	55726	11
Metuchen	NJ	New Jersey	40.5411	-74.361	13530	11
Cranston	RI	Rhode Island	41.7732	-71.4533	81771	11
Redding	CA	California	40.5766	-122.37	89710	10
San Luis Obispo	CA	California	35.2743	-120.663	46072	10
Menlo Park	CA	California	37.4542	-122.179	30889	10
Indio	CA	California	33.7199	-116.232	80922	10
Sioux City	IA	Iowa	42.498	-96.3957	84054	10
Buffalo	MN	Minnesota	45.1832	-93.8655	13945	10
Benton Harbor	MI	Michigan	42.1111	-86.4482	10865	10
Neenah	WI	Wisconsin	44.174	-88.4685	24711	10
Wyoming	MI	Michigan	42.8998	-85.6987	72070	10
Midland	MI	Michigan	43.6227	-84.2306	42488	10
North Tonawanda	NY	New York	43.041	-78.8689	32405	10
Lackawanna	NY	New York	42.8194	-78.8256	18772	10
Irondequoit	NY	New York	43.208	-77.5752	51506	10
North Adams	MA	Massachusetts	42.6939	-73.1151	14357	10
Reading	MA	Massachusetts	42.5259	-71.1099	23471	10
Franklin	MA	Massachusetts	42.0891	-71.4069	31243	10
Concord	NH	New Hampshire	43.2201	-71.5491	44062	10
Key Largo	FL	Florida	25.1066	-80.4299	12202	10
Kenner	LA	Louisiana	30.0096	-90.2506	67747	10
Biloxi	MS	Mississippi	30.412	-88.9278	42984	10
Venice	FL	Florida	27.0987	-82.439	19553	10
Pembroke Pines	FL	Florida	26.0129	-80.3137	157563	10
Homestead	FL	Florida	25.4712	-80.4681	40531	10
North Miami	FL	Florida	25.895	-80.1857	61919	10
Jonesboro	AR	Arkansas	35.8281	-90.694	60526	10
Murfreesboro	TN	Tennessee	35.8577	-86.3947	89047	10
Troy	AL	Alabama	31.802	-85.9673	13712	10
Oak Park	IL	Illinois	41.886	-87.7903	50939	10
Hammond	IN	Indiana	41.6112	-87.4931	81317	10
Jasper	IN	Indiana	38.3953	-86.9327	12940	10
Bowling Green	KY	Kentucky	36.9817	-86.4444	54020	10
Frankfort	KY	Kentucky	38.1973	-84.8631	27457	10
Sandusky	OH	Ohio	41.4467	-82.7091	27054	10
North Canton	OH	Ohio	40.875	-81.4011	16407	10
Whitehall	PA	Pennsylvania	40.3603	-79.9863	13946	10
Huntington	WV	West Virginia	38.413	-82.4336	49107	10
Griffin	GA	Georgia	33.2476	-84.2709	24897	10
Kennesaw	GA	Georgia	34.0252	-84.6159	28713	10
Druid Hills	GA	Georgia	33.7872	-84.326	13030	10
North Druid Hills	GA	Georgia	33.8197	-84.3281	18464	10
Beaufort	SC	South Carolina	32.4319	-80.6895	13643	10
Woodbridge	VA	Virginia	38.6435	-77.2608	39042	10
Springfield	VA	Virginia	38.7887	-77.1794	34727	10
Indiana	PA	Pennsylvania	40.6211	-79.1549	15124	10
Hagerstown	MD	Maryland	39.6428	-77.72	38569	10
Point Pleasant	NJ	New Jersey	40.0796	-74.0704	19862	10
Ansonia	CT	Connecticut	41.3427	-73.0745	18606	10
West Islip	NY	New York	40.715	-73.2977	29473	10
Auburn	WA	Washington	47.3023	-122.215	42387	9
Concord	CA	California	37.9678	-122.015	127722	9
Lodi	CA	California	38.1288	-121.281	65046	9
Lake Forest	CA	California	33.6416	-117.691	60679	9
Norwalk	CA	California	33.9069	-118.083	109476	9
Fullerton	CA	California	33.8799	-117.929	135719	9
Hesperia	CA	California	34.4129	-117.306	80644	9
Grand Junction	CO	Colorado	39.0805	-108.559	47597	9
Sandy	UT	Utah	40.5724	-111.86	89981	9
Orem	UT	Utah	40.2988	-111.696	91986	9
Carlsbad	NM	New Mexico	32.4119	-104.236	25073	9
Leawood	KS	Kansas	38.9208	-94.6221	32508	9
Ennis	TX	Texas	32.3323	-96.624	18981	9
Texarkana	TX	Texas	33.4372	-94.0674	36553	9
Minden	LA	Louisiana	32.6168	-93.2833	12671	9
Round Rock	TX	Texas	30.5149	-97.6726	85593	9
South Houston	TX	Texas	29.661	-95.2298	17125	9
Chanhassen	MN	Minnesota	44.8654	-93.5542	25567	9
Whitewater	WI	Wisconsin	42.835	-88.7361	13770	9
Oshkosh	WI	Wisconsin	44.025	-88.5513	64290	9
Fredonia	NY	New York	42.4408	-79.3338	10861	9
Endicott	NY	New York	42.1031	-76.0547	12732	9
Cortland	NY	New York	42.6007	-76.1813	18579	9
Lebanon	NH	New Hampshire	43.6439	-72.2552	13697	9
Wellesley	MA	Massachusetts	42.3063	-71.2878	26722	9
Palm Coast	FL	Florida	29.5381	-81.2234	66877	9
Vero Beach	FL	Florida	27.6418	-80.3911	18945	9
Cape Coral	FL	Florida	26.6396	-81.9825	158446	9
Coral Springs	FL	Florida	26.2707	-80.2592	129076	9
North Miami Beach	FL	Florida	25.9302	-80.1698	43211	9
Washington	MO	Missouri	38.5519	-91.0133	14242	9
Maryland Heights	MO	Missouri	38.7196	-90.4475	25468	9
Chesterfield	MO	Missouri	38.6534	-90.5543	47023	9
Aurora	IL	Illinois	41.7599	-88.2985	176279	9
Burr Ridge	IL	Illinois	41.753	-87.92	10564	9
Kokomo	IN	Indiana	40.4822	-86.1318	45998	9
Monroe	MI	Michigan	41.9181	-83.3935	22731	9
Bexley	OH	Ohio	39.9646	-82.9326	12917	9
Marietta	OH	Ohio	39.4208	-81.4505	14090	9
Westlake	OH	Ohio	41.4544	-81.9287	31915	9
Lakewood	OH	Ohio	41.4809	-81.8004	53761	9
Carrollton	GA	Georgia	33.5809	-85.0767	24500	9
Anderson	SC	South Carolina	34.5145	-82.6489	26380	9
Boone	NC	North Carolina	36.2114	-81.6687	13381	9
Gaithersburg	MD	Maryland	39.132	-77.2264	62166	9
Petersburg	VA	Virginia	37.213	-77.4004	31818	9
McKeesport	PA	Pennsylvania	40.3439	-79.8488	22599	9
Lansdale	PA	Pennsylvania	40.242	-75.2841	16209	9
Ocean City	NJ	New Jersey	39.2654	-74.5938	14954	9
Mount Vernon	VA	Virginia	38.7252	-77.1073	30030	9
Fords	NJ	New Jersey	40.5371	-74.314	15308	9
Ringwood	NJ	New Jersey	41.0961	-74.2601	12724	9
Kiryas Joel	NY	New York	41.34	-74.1672	16040	9
Seaford	NY	New York	40.6687	-73.4925	15952	9
Commack	NY	New York	40.845	-73.2832	37020	9
Central Islip	NY	New York	40.7842	-73.1991	33871	9
Groton	CT	Connecticut	41.3452	-72.0734	9323	9
Newington	CT	Connecticut	41.6889	-72.731	29888	9
Warwick	RI	Rhode Island	41.7181	-71.4152	87183	9
New Bedford	MA	Massachusetts	41.6518	-70.9337	96834	9
Kennewick	WA	Washington	46.2035	-119.159	61930	8
Dallas	OR	Oregon	44.9211	-123.316	13855	8
Everett	WA	Washington	47.9634	-122.201	96885	8
Kirkland	WA	Washington	47.6858	-122.192	47265	8
Oxnard	CA	California	34.1913	-119.183	190450	8
Mill Valley	CA	California	37.9055	-122.543	13782	8
Hercules	CA	California	38.0075	-122.259	22357	8
Piedmont	CA	California	37.822	-122.231	10837	8
Truckee	CA	California	39.3422	-120.204	16478	8
Hollister	CA	California	36.8471	-121.398	37385	8
Salinas	CA	California	36.6839	-121.643	153879	8
Elk Grove	CA	California	38.4382	-121.382	71681	8
Linda	CA	California	39.1252	-121.563	16337	8
Pomona	CA	California	34.0608	-117.756	160641	8
Banning	CA	California	33.9317	-116.898	27929	8
North Las Vegas	NV	Nevada	36.2285	-115.147	174510	8
Clovis	NM	New Mexico	34.4125	-103.205	34172	8
Kearns	UT	Utah	40.6532	-112.007	34948	8
Sterling	CO	Colorado	40.6254	-103.212	12713	8
Wichita Falls	TX	Texas	33.897	-98.5149	103927	8
Lawton	OK	Oklahoma	34.6094	-98.4178	92643	8
Weatherford	TX	Texas	32.7592	-97.785	21423	8
Hurst	TX	Texas	32.8356	-97.1802	37222	8
Grand Prairie	TX	Texas	32.7153	-97.0169	148975	8
Addison	TX	Texas	32.9577	-96.8351	15040	8
Bartlesville	OK	Oklahoma	36.7472	-95.9595	34880	8
Georgetown	TX	Texas	30.6512	-97.6813	39818	8
Huntsville	TX	Texas	30.7113	-95.5484	37807	8
Pearland	TX	Texas	29.5543	-95.296	54159	8
Opelousas	LA	Louisiana	30.5282	-92.0844	23022	8
Rapid City	SD	South Dakota	44.0762	-103.228	63735	8
Great Falls	MT	Montana	47.5037	-111.286	55504	8
Shoreview	MN	Minnesota	45.0856	-93.1353	26250	8
Sheboygan	WI	Wisconsin	43.7497	-87.725	50786	8
Beloit	WI	Wisconsin	42.5166	-89.03	36378	8
Wausau	WI	Wisconsin	44.9612	-89.6388	39358	8
Fitchburg	WI	Wisconsin	43.0063	-89.4315	23737	8
Arlington Heights	IL	Illinois	42.095	-87.9809	74495	8
Ionia	MI	Michigan	42.9819	-85.0668	12298	8
Warren	MI	Michigan	42.492	-83.024	138180	8
Marblehead	MA	Massachusetts	42.4971	-70.8632	20441	8
Beverly	MA	Massachusetts	42.561	-70.8757	40441	8
Lexington	MA	Massachusetts	42.4443	-71.2269	29993	8
Lake Mary	FL	Florida	28.7576	-81.329	12994	8
Sanford	FL	Florida	28.7933	-81.2766	45972	8
Country Club	FL	Florida	25.9391	-80.3112	44299	8
Hallandale	FL	Florida	25.9867	-80.146	36415	8
Peru	IN	Indiana	40.7577	-86.0678	12417	8
Rock Island	IL	Illinois	41.4891	-90.5732	38351	8
Glen Ellyn	IL	Illinois	41.871	-88.063	27877	8
Worth	IL	Illinois	41.6888	-87.7927	10605	8
Owensboro	KY	Kentucky	37.7577	-87.1184	55207	8
Bedford	IN	Indiana	38.8627	-86.4923	13741	8
Newport	KY	Kentucky	39.0887	-84.4902	16120	8
New Haven	IN	Indiana	41.0676	-85.0215	13282	8
Defiance	OH	Ohio	41.2819	-84.3629	16014	8
Greer	SC	South Carolina	34.9303	-82.2251	18961	8
Brunswick	GA	Georgia	31.1588	-81.4893	15608	8
Harrisonburg	VA	Virginia	38.4433	-78.8728	44036	8
Winchester	VA	Virginia	39.1784	-78.1668	25770	8
Potomac	MD	Maryland	39.0227	-77.1864	45610	8
Jefferson	VA	Virginia	38.8673	-77.1855	27667	8
Martinsburg	WV	West Virginia	39.4592	-77.9678	17835	8
Parkville	MD	Maryland	39.383	-76.5501	31287	8
Aberdeen	MD	Maryland	39.5103	-76.1692	14883	8
Berkeley Heights	NJ	New Jersey	40.6774	-74.4297	13635	8
Haddonfield	NJ	New Jersey	39.8963	-75.0359	11688	8
Cambridge	MD	Maryland	38.5663	-76.0771	11559	8
Dix Hills	NY	New York	40.7961	-73.3344	26888	8
Copiague	NY	New York	40.6747	-73.3932	22789	8
Kings Park	NY	New York	40.8885	-73.2426	16642	8
Centereach	NY	New York	40.8722	-73.0807	29405	8
Medford	NY	New York	40.8177	-72.9861	24490	8
Attleboro	MA	Massachusetts	41.9281	-71.3146	43351	8
Issaquah	WA	Washington	47.5356	-122.043	13545	7
Yakima	WA	Washington	46.5967	-120.53	74257	7
Novato	CA	California	38.0934	-122.565	50929	7
Burlingame	CA	California	37.5832	-122.364	28442	7
Foster City	CA	California	37.5513	-122.266	29503	7
San Leandro	CA	California	37.7107	-122.153	81853	7
Merced	CA	California	37.306	-120.478	73956	7
Thousand Oaks	CA	California	34.1895	-118.875	127041	7
Lakewood	CA	California	33.8474	-118.12	81756	7
Fountain Valley	CA	California	33.7086	-117.956	57929	7
Diamond Bar	CA	California	34.0017	-117.821	59562	7
Prescott	AZ	Arizona	34.5682	-112.461	42468	7
Lakewood	CO	Colorado	39.7063	-105.103	144369	7
Las Cruces	NM	New Mexico	32.3197	-106.765	86870	7
San Angelo	TX	Texas	31.4531	-100.452	88135	7
Grapevine	TX	Texas	32.935	-97.0858	46328	7
Bedford	TX	Texas	32.8468	-97.1396	48431	7
Dodge City	KS	Kansas	37.7597	-100.018	26867	7
Derby	KS	Kansas	37.5524	-97.2615	18800	7
Sherman	TX	Texas	33.6411	-96.61	37265	7
Conway	AR	Arkansas	35.0873	-92.4533	53345	7
Plymouth	MN	Minnesota	45.0158	-93.4589	71452	7
Shakopee	MN	Minnesota	44.7869	-93.5025	34753	7
Kenosha	WI	Wisconsin	42.5822	-87.8456	96473	7
Fenton	MI	Michigan	42.7989	-83.7121	12313	7
Waterville	ME	Maine	44.5521	-69.6458	15827	7
Arlington	MA	Massachusetts	42.4179	-71.1657	41874	7
Methuen	MA	Massachusetts	42.73	-71.1794	45644	7
Lewiston	ME	Maine	44.0975	-70.1924	36958	7
Gulfport	MS	Mississippi	30.4016	-89.0762	69925	7
Leesburg	FL	Florida	28.8107	-81.8833	18742	7
Apopka	FL	Florida	28.6761	-81.5106	32271	7
Palm Bay	FL	Florida	27.983	-80.6588	101865	7
Winter Haven	FL	Florida	28.0343	-81.7217	28144	7
Plantation	FL	Florida	26.1244	-80.2495	87225	7
Kendall	FL	Florida	25.6668	-80.3565	76867	7
Hattiesburg	MS	Mississippi	31.316	-89.3087	45425	7
Selma	AL	Alabama	32.4164	-87.0247	18815	7
Tuskegee	AL	Alabama	32.4315	-85.7068	11327	7
Hoover	AL	Alabama	33.3864	-86.8049	71480	7
Cape Girardeau	MO	Missouri	37.309	-89.5465	35690	7
Kankakee	IL	Illinois	41.117	-87.8639	28312	7
Urbana	IL	Illinois	40.1097	-88.2042	39102	7
Schaumburg	IL	Illinois	42.0301	-88.0874	73283	7
Geneva	IL	Illinois	41.8857	-88.3118	25027	7
Elmhurst	IL	Illinois	41.8923	-87.9438	43387	7
Muncie	IN	Indiana	40.1932	-85.3882	66895	7
Maumee	OH	Ohio	41.5705	-83.6525	14633	7
Bowling Green	OH	Ohio	41.3739	-83.6509	31266	7
Springfield	OH	Ohio	39.9271	-83.8041	62124	7
Coshocton	OH	Ohio	40.2678	-81.8566	11471	7
Douglas	GA	Georgia	31.5074	-82.8508	11292	7
Buford	GA	Georgia	34.1171	-83.9985	14192	7
Salisbury	NC	North Carolina	35.6683	-80.4785	27167	7
North Charleston	SC	South Carolina	32.8854	-80.0169	82137	7
Burlington	NC	North Carolina	36.0896	-79.4456	48079	7
Cumberland	MD	Maryland	39.6477	-78.7629	20663	7
Altoona	PA	Pennsylvania	40.5107	-78.3998	47190	7
Hanover	PA	Pennsylvania	39.8073	-76.9847	15340	7
Owings Mills	MD	Maryland	39.4123	-76.7931	26171	7
Elkton	MD	Maryland	39.61	-75.8259	14381	7
Phillipsburg	NJ	New Jersey	40.6895	-75.1853	16073	7
West Milford	NJ	New Jersey	41.1186	-74.3836	27431	7
Willow Grove	PA	Pennsylvania	40.1461	-75.1166	16267	7
Manville	NJ	New Jersey	40.539	-74.5934	10594	7
Adelphi	MD	Maryland	38.9969	-76.9668	15324	7
East Haven	CT	Connecticut	41.2886	-72.8669	29073	7
West Haven	CT	Connecticut	41.2721	-72.965	52851	7
College	AK	Alaska	64.8483	-147.827	12717	6
Kent	WA	Washington	47.3827	-122.227	85589	6
Santa Paula	CA	California	34.3558	-119.068	29742	6
Windsor	CA	California	38.546	-122.805	24893	6
San Rafael	CA	California	37.9833	-122.524	57357	6
Vallejo	CA	California	38.113	-122.236	123405	6
Hayward	CA	California	37.6436	-122.077	147573	6
Dublin	CA	California	37.7142	-121.912	35240	6
Saratoga	CA	California	37.2724	-122.02	30641	6
Antioch	CA	California	37.9924	-121.802	104919	6
Oakley	CA	California	37.9935	-121.718	30910	6
Alpine	CA	California	32.8346	-116.771	13648	6
Oceanside	CA	California	33.2116	-117.326	173851	6
Simi Valley	CA	California	34.2711	-118.739	123508	6
Redondo Beach	CA	California	33.8565	-118.377	66409	6
Kingman	AZ	Arizona	35.2084	-114.026	24331	6
Durango	CO	Colorado	37.2787	-107.871	15241	6
Laramie	WY	Wyoming	41.3129	-105.587	28111	6
Abilene	TX	Texas	32.4464	-99.7455	115018	6
Lenexa	KS	Kansas	38.9647	-94.7595	45116	6
Natchez	MS	Mississippi	31.5544	-91.3876	17434	6
Stafford	TX	Texas	29.6242	-95.5634	19442	6
Port Arthur	TX	Texas	29.8849	-93.9399	57351	6
Lake Charles	LA	Louisiana	30.2147	-93.2085	72003	6
La Crosse	WI	Wisconsin	43.8132	-91.2331	51289	6
Stillwater	MN	Minnesota	45.0552	-92.8186	17244	6
Cedar Falls	IA	Iowa	42.5235	-92.4464	36803	6
Waterloo	IA	Iowa	42.4924	-92.3462	67684	6
Stevens Point	WI	Wisconsin	44.523	-89.5603	24615	6
Lake Forest	IL	Illinois	42.2348	-87.851	21020	6
Waukegan	IL	Illinois	42.3725	-87.8615	93939	6
Plymouth	MI	Michigan	42.37	-83.4819	27903	6
Sterling Heights	MI	Michigan	42.5798	-83.0281	133647	6
Shelby	MI	Michigan	42.6708	-83.033	74026	6
Olean	NY	New York	42.0826	-78.431	14768	6
Johnson City	NY	New York	42.1167	-75.9593	15066	6
Fort Drum	NY	New York	44.038	-75.7579	12635	6
Montpelier	VT	Vermont	44.2614	-72.5728	8104	6
Londonderry	NH	New Hampshire	42.8493	-71.3574	12017	6
Auburn	ME	Maine	44.0892	-70.2414	24150	6
Laplace	LA	Louisiana	30.075	-90.4849	30875	6
Jefferson	LA	Louisiana	29.9641	-90.1572	11413	6
Brent	FL	Florida	30.4705	-87.2491	22712	6
Wright	FL	Florida	30.4464	-86.6354	23101	6
Spring Hill	FL	Florida	28.4789	-82.5477	92667	6
Weston	FL	Florida	26.1075	-80.3882	63443	6
Pompano Beach	FL	Florida	26.2347	-80.1256	83376	6
Clarksdale	MS	Mississippi	34.1979	-90.5719	19301	6
Southaven	MS	Mississippi	34.9667	-89.9873	39011	6
Gadsden	AL	Alabama	34.0101	-86.0104	37644	6
Enterprise	AL	Alabama	31.3275	-85.8445	23104	6
Carbondale	IL	Illinois	37.7264	-89.2203	23968	6
Decatur	IL	Illinois	39.8516	-88.9442	78597	6
Marion	IN	Indiana	40.5491	-85.6647	29781	6
Clarksville	TN	Tennessee	36.5594	-87.3583	124402	6
Georgetown	KY	Kentucky	38.2145	-84.5555	23018	6
Chillicothe	OH	Ohio	39.3365	-82.9838	21729	6
Mentor	OH	Ohio	41.6912	-81.342	50777	6
Norwalk	OH	Ohio	41.243	-82.6114	16161	6
Streetsboro	OH	Ohio	41.2425	-81.3491	14342	6
Salem	VA	Virginia	37.2869	-80.0558	25156	6
Cordele	GA	Georgia	31.9642	-83.7773	11684	6
Rome	GA	Georgia	34.2599	-85.185	36773	6
North Atlanta	GA	Georgia	33.8627	-84.3335	41729	6
Newton	NC	North Carolina	35.6651	-81.2244	13421	6
Orangeburg	SC	South Carolina	33.4968	-80.8622	13438	6
Kinston	NC	North Carolina	35.2707	-77.5851	22998	6
North Myrtle Beach	SC	South Carolina	33.8222	-78.681	13131	6
Leesburg	VA	Virginia	39.1092	-77.5579	44575	6
Lorton	VA	Virginia	38.7049	-77.2336	22955	6
Chantilly	VA	Virginia	38.875	-77.4026	47970	6
Tysons Corner	VA	Virginia	38.9185	-77.2298	19070	6
Johnstown	PA	Pennsylvania	40.3252	-78.921	21991	6
Greensburg	PA	Pennsylvania	40.3045	-79.5445	15610	6
Horsham	PA	Pennsylvania	40.1824	-75.1344	14776	6
Bound Brook	NJ	New Jersey	40.5652	-74.5395	10545	6
Laurel	MD	Maryland	39.0983	-76.8591	20722	6
North Babylon	NY	New York	40.7306	-73.3214	18192	6
Norwich	CT	Connecticut	41.5397	-72.0821	37234	6
Webster	MA	Massachusetts	42.049	-71.8756	11986	6
Windsor Locks	CT	Connecticut	41.927	-72.6469	12396	6
Sammamish	WA	Washington	47.6088	-122.042	40598	5
Sherwood	OR	Oregon	45.357	-122.843	15385	5
Moscow	ID	Idaho	46.7317	-116.997	22711	5
Santa Maria	CA	California	34.9514	-120.433	86591	5
Ukiah	CA	California	39.1488	-123.209	16059	5
Albany	CA	California	37.8916	-122.296	16748	5
San Carlos	CA	California	37.4992	-122.263	27953	5
Los Gatos	CA	California	37.236	-121.962	28807	5
Gilroy	CA	California	37.012	-121.58	46789	5
Rancho Cordova	CA	California	38.5851	-121.297	62034	5
Clovis	CA	California	36.8194	-119.695	88424	5
San Clemente	CA	California	33.4378	-117.62	55257	5
Mission Viejo	CA	California	33.6127	-117.656	97887	5
Santa Clarita	CA	California	34.4166	-118.506	190583	5
Manhattan Beach	CA	California	33.889	-118.405	34551	5
Fontana	CA	California	34.0977	-117.458	168485	5
Rancho Mirage	CA	California	33.7692	-116.421	18002	5
Paradise	NV	Nevada	36.0821	-115.125	222370	5
American Fork	UT	Utah	40.3842	-111.792	26853	5
Los Alamos	NM	New Mexico	35.8911	-106.298	13067	5
Duncan	OK	Oklahoma	34.5166	-97.9494	22575	5
Norfolk	NE	Nebraska	42.0331	-97.421	23772	5
Olathe	KS	Kansas	38.8808	-94.8032	113433	5
Papillion	NE	Nebraska	41.1559	-96.0409	20116	5
Sedalia	MO	Missouri	38.7029	-93.2311	20401	5
Mexico	MO	Missouri	39.1658	-91.8848	10815	5
Rowlett	TX	Texas	32.907	-96.5474	52567	5
Fort Smith	AR	Arkansas	35.3687	-94.3987	82719	5
Brownsville	TX	Texas	25.9303	-97.4844	167366	5
Victoria	TX	Texas	28.8169	-96.9935	61578	5
Portland	TX	Texas	27.8831	-97.3205	16838	5
Sugar Land	TX	Texas	29.5996	-95.6141	73225	5
Grand Forks	ND	North Dakota	47.9123	-97.0549	50374	5
Marshall	MN	Minnesota	44.4472	-95.7879	12948	5
Superior	WI	Wisconsin	46.7069	-92.0853	27709	5
Richfield	MN	Minnesota	44.8772	-93.2812	34412	5
Burnsville	MN	Minnesota	44.7561	-93.2812	63733	5
Hastings	MN	Minnesota	44.7333	-92.8578	21842	5
Alpena	MI	Michigan	45.0648	-83.4413	10856	5
Portage	MI	Michigan	42.2096	-85.5885	46453	5
Janesville	WI	Wisconsin	42.6841	-89.0167	62200	5
Middleton	WI	Wisconsin	43.1016	-89.4995	17239	5
Highland Park	IL	Illinois	42.1825	-87.8071	31498	5
West Allis	WI	Wisconsin	43.0081	-88.0184	58590	5
Mount Pleasant	MI	Michigan	43.6009	-84.775	29056	5
Novi	MI	Michigan	42.4803	-83.4775	55270	5
Ypsilanti	MI	Michigan	42.2429	-83.6182	22802	5
Rochester	MI	Michigan	42.685	-83.1269	11988	5
Ferndale	MI	Michigan	42.4611	-83.1291	21629	5
Oak Park	MI	Michigan	42.4672	-83.1795	29301	5
Westfield	MA	Massachusetts	42.1295	-72.746	41476	5
Newburyport	MA	Massachusetts	42.8124	-70.8774	18385	5
Winchester	MA	Massachusetts	42.4519	-71.1428	20611	5
Lynn	MA	Massachusetts	42.474	-70.9556	92131	5
Peabody	MA	Massachusetts	42.534	-70.9615	50470	5
Winthrop	MA	Massachusetts	42.3748	-70.9797	17702	5
Watertown	MA	Massachusetts	42.3713	-71.182	32943	5
Dover	NH	New Hampshire	43.191	-70.8785	30111	5
Saco	ME	Maine	43.5104	-70.4449	18525	5
Hammond	LA	Louisiana	30.5044	-90.4656	19606	5
Tarpon Springs	FL	Florida	28.1487	-82.7581	22356	5
Dunedin	FL	Florida	28.0254	-82.7753	36950	5
New Port Richey	FL	Florida	28.2489	-82.7177	17385	5
Jacksonville Beach	FL	Florida	30.2841	-81.3961	22179	5
Boynton Beach	FL	Florida	26.5281	-80.0764	66740	5
Vicksburg	MS	Mississippi	32.336	-90.8754	25663	5
Decatur	AL	Alabama	34.581	-86.9834	54999	5
Gallatin	TN	Tennessee	36.3814	-86.4513	25948	5
Anniston	AL	Alabama	33.663	-85.8267	23508	5
St Charles	MO	Missouri	38.7887	-90.5118	65147	5
Clayton	MO	Missouri	38.6453	-90.3318	12822	5
Downers Grove	IL	Illinois	41.7907	-88.0149	49245	5
Des Plaines	IL	Illinois	42.0338	-87.8998	59150	5
Wood Dale	IL	Illinois	41.9631	-87.9783	13926	5
Justice	IL	Illinois	41.7464	-87.8344	12624	5
Valparaiso	IN	Indiana	41.4762	-87.0569	29429	5
Springfield	TN	Tennessee	36.4995	-86.8787	16458	5
Florence	KY	Kentucky	38.9932	-84.6426	28885	5
Vandalia	OH	Ohio	39.8799	-84.1936	14433	5
Lebanon	OH	Ohio	39.4267	-84.2126	21233	5
Coldwater	MI	Michigan	41.9428	-85.0025	13797	5
Wilmington	OH	Ohio	39.4459	-83.8291	12454	5
Reynoldsburg	OH	Ohio	39.9599	-82.8013	34225	5
Grove City	OH	Ohio	39.878	-83.0782	30554	5
Alliance	OH	Ohio	40.9134	-81.1081	22689	5
Bristol	TN	Tennessee	36.5691	-82.1975	24975	5
Opelika	AL	Alabama	32.6472	-85.3894	25377	5
Cookeville	TN	Tennessee	36.1642	-85.5043	25957	5
Oak Ridge	TN	Tennessee	35.9882	-84.2863	28264	5
Maryville	TN	Tennessee	35.7499	-83.9758	24833	5
Gainesville	GA	Georgia	34.3045	-83.8339	30540	5
Duluth	GA	Georgia	34.0031	-84.1455	25689	5
Statesville	NC	North Carolina	35.7868	-80.8785	26083	5
Kernersville	NC	North Carolina	36.1162	-80.082	19846	5
Hickory	NC	North Carolina	35.7377	-81.3284	39034	5
West Columbia	SC	South Carolina	33.9888	-81.0798	13617	5
Jacksonville	NC	North Carolina	34.7596	-77.4098	74441	5
Sanford	NC	North Carolina	35.4759	-79.1755	25940	5
Graham	NC	North Carolina	36.0645	-79.3979	13841	5
Danville	VA	Virginia	36.5872	-79.4044	45517	5
Martinsville	VA	Virginia	36.6861	-79.8692	14621	5
Monroeville	PA	Pennsylvania	40.431	-79.7653	28227	5
Bear	DE	Delaware	39.6204	-75.6848	19007	5
Woodbury	NJ	New Jersey	39.8374	-75.1531	10763	5
Salisbury	MD	Maryland	38.3658	-75.5934	25552	5
Fort Washington	MD	Maryland	38.7435	-77.0104	25579	5
Hyattsville	MD	Maryland	38.9569	-76.9513	14947	5
Greenbelt	MD	Maryland	39.0005	-76.8883	22382	5
Glen Burnie	MD	Maryland	39.16	-76.6106	40699	5
Wyandanch	NY	New York	40.7471	-73.3683	11352	5
Coram	NY	New York	40.8904	-73.0104	36914	5
Farmingville	NY	New York	40.8426	-73.0437	17567	5
Lake Grove	NY	New York	40.8563	-73.1166	11030	5
Holbrook	NY	New York	40.7997	-73.0756	28207	5
Sayville	NY	New York	40.7463	-73.0811	17099	5
Hampton Bays	NY	New York	40.8739	-72.5212	13097	5
East Hartford	CT	Connecticut	41.7615	-72.6155	49854	5
Lacey	WA	Washington	47.0264	-122.807	35382	4
Lakewood	WA	Washington	47.1639	-122.526	58569	4
Wilsonville	OR	Oregon	45.3068	-122.766	16276	4
Sunnyside	WA	Washington	46.3208	-120.012	15009	4
Nampa	ID	Idaho	43.5748	-116.564	71118	4
Elko	NV	Nevada	40.8364	-115.766	16705	4
Spring Creek	NV	Nevada	40.7466	-115.593	11269	4
Arcata	CA	California	40.8728	-124.083	17535	4
Carpinteria	CA	California	34.399	-119.516	14782	4
Montecito	CA	California	34.4337	-119.632	10162	4
Petaluma	CA	California	38.2458	-122.631	57377	4
Fairfield	CA	California	38.2578	-122.054	106906	4
Vacaville	CA	California	38.3538	-121.973	94546	4
Campbell	CA	California	37.2839	-121.955	38774	4
Livermore	CA	California	37.6855	-121.764	80620	4
Tracy	CA	California	37.738	-121.434	76894	4
South Lake Tahoe	CA	California	38.9292	-119.984	26411	4
Morgan Hill	CA	California	37.1268	-121.643	37545	4
Dixon	CA	California	38.4491	-121.827	17579	4
Poway	CA	California	32.9699	-117.038	49525	4
Fillmore	CA	California	34.4013	-118.918	14941	4
Agoura Hills	CA	California	34.1534	-118.762	21570	4
San Gabriel	CA	California	34.0942	-118.098	41499	4
Gardena	CA	California	33.8936	-118.308	61456	4
Paramount	CA	California	33.8999	-118.167	57155	4
Tustin	CA	California	33.7396	-117.814	71573	4
Highland	CA	California	34.1185	-117.202	53279	4
Moreno Valley	CA	California	33.9263	-117.228	184969	4
Desert Hot Springs	CA	California	33.961	-116.508	24177	4
Yuma	AZ	Arizona	32.6921	-114.615	91424	4
Sun City	AZ	Arizona	33.6142	-112.282	40493	4
Florence	AZ	Arizona	33.0422	-111.385	17391	4
Sun Lakes	AZ	Arizona	33.2147	-111.87	15826	4
Lehi	UT	Utah	40.4017	-111.859	34890	4
Draper	UT	Utah	40.5148	-111.873	36024	4
Highlands Ranch	CO	Colorado	39.5445	-104.968	90319	4
Broomfield	CO	Colorado	39.9318	-105.066	46571	4
Socorro	TX	Texas	31.6413	-106.275	29447	4
Rio Rancho	NM	New Mexico	35.2862	-106.671	68628	4
Plainview	TX	Texas	34.1912	-101.719	21958	4
Big Spring	TX	Texas	32.2432	-101.475	25265	4
Snyder	TX	Texas	32.7155	-100.914	10430	4
Woodward	OK	Oklahoma	36.4331	-99.3977	12058	4
Southlake	TX	Texas	32.9467	-97.1452	25092	4
Coppell	TX	Texas	32.9673	-96.9866	38391	4
Waxahachie	TX	Texas	32.3999	-96.8473	25416	4
North Platte	NE	Nebraska	41.1359	-100.771	24503	4
Columbus	NE	Nebraska	41.4328	-97.3585	21105	4
Hastings	NE	Nebraska	40.5893	-98.3917	24720	4
Emporia	KS	Kansas	38.4081	-96.1871	26967	4
Coralville	IA	Iowa	41.6882	-91.5868	17850	4
Henderson	TX	Texas	32.1539	-94.8027	11261	4
Jacksonville	TX	Texas	31.9635	-95.2686	14076	4
Marshall	TX	Texas	32.5429	-94.3637	24382	4
Mount Pleasant	TX	Texas	33.1579	-94.9701	14386	4
Denison	TX	Texas	33.7497	-96.5574	23917	4
Rogers	AR	Arkansas	36.3294	-94.1414	49569	4
Bossier City	LA	Louisiana	32.5177	-93.6914	60939	4
Pharr	TX	Texas	26.2063	-98.1852	61825	4
Angleton	TX	Texas	29.1665	-95.4281	18811	4
Rosenberg	TX	Texas	29.5524	-95.8049	27471	4
League City	TX	Texas	29.4998	-95.0898	62235	4
Minot	ND	North Dakota	48.2332	-101.292	35959	4
Brainerd	MN	Minnesota	46.3591	-94.1932	13587	4
Hibbing	MN	Minnesota	47.4172	-92.9383	16470	4
Golden Valley	MN	Minnesota	44.9925	-93.3592	20875	4
Maplewood	MN	Minnesota	44.9929	-93.0239	36523	4
Roseville	MN	Minnesota	45.0141	-93.1531	33348	4
Northfield	MN	Minnesota	44.4561	-93.1625	19680	4
Woodstock	IL	Illinois	42.3176	-88.4462	24196	4
Freeport	IL	Illinois	42.292	-89.6304	25860	4
Hoffman Estates	IL	Illinois	42.0632	-88.1193	48980	4
Grayslake	IL	Illinois	42.3483	-88.0324	22200	4
Gurnee	IL	Illinois	42.3737	-87.9344	31919	4
Ashwaubenon	WI	Wisconsin	44.4872	-88.0833	17874	4
Birmingham	MI	Michigan	42.5448	-83.2153	19182	4
Depew	NY	New York	42.9118	-78.7016	16081	4
Endwell	NY	New York	42.115	-76.026	11413	4
Ogdensburg	NY	New York	44.7005	-75.4812	12157	4
Agawam	MA	Massachusetts	42.072	-72.6441	28554	4
Greenfield	MA	Massachusetts	42.5927	-72.5996	13725	4
Easthampton	MA	Massachusetts	42.2651	-72.6685	16846	4
Milford	MA	Massachusetts	42.1458	-71.519	25423	4
Marlborough	MA	Massachusetts	42.3509	-71.5475	37538	4
Norwood	MA	Massachusetts	42.186	-71.2017	28731	4
Brockton	MA	Massachusetts	42.0825	-71.0218	97149	4
Haverhill	MA	Massachusetts	42.7781	-71.0849	61544	4
Derry	NH	New Hampshire	42.8839	-71.3085	23395	4
Westbrook	ME	Maine	43.6853	-70.3571	16607	4
South Portland	ME	Maine	43.6315	-70.2727	24592	4
Tullahoma	TN	Tennessee	35.3685	-86.2133	18933	4
Raceland	LA	Louisiana	29.7226	-90.6052	10773	4
Winter Garden	FL	Florida	28.5603	-81.5841	19756	4
Longwood	FL	Florida	28.7021	-81.3451	14231	4
Ormond Beach	FL	Florida	29.2864	-81.0749	40925	4
Florida Ridge	FL	Florida	27.5745	-80.3917	18983	4
Villas	FL	Florida	26.555	-81.869	13998	4
Bonita Springs	FL	Florida	26.3497	-81.7909	47940	4
Royal Palm Beach	FL	Florida	26.7059	-80.2266	32567	4
Palm Beach Gardens	FL	Florida	26.8286	-80.11	44070	4
Davie	FL	Florida	26.0814	-80.2802	84232	4
Greenville	MS	Mississippi	33.3986	-91.0484	38888	4
Meridian	MS	Mississippi	32.3748	-88.7042	39103	4
Talladega	AL	Alabama	33.4347	-86.1013	16238	4
Kirkwood	MO	Missouri	38.5807	-90.4143	26668	4
Arnold	MO	Missouri	38.4328	-90.3694	21536	4
Jackson	MO	Missouri	37.3799	-89.6581	12942	4
Oswego	IL	Illinois	41.6907	-88.3418	21918	4
Morton	IL	Illinois	40.6116	-89.4633	15849	4
Elk Grove Village	IL	Illinois	42.0032	-87.9964	33725	4
Bolingbrook	IL	Illinois	41.6986	-88.0887	73195	4
Lisle	IL	Illinois	41.7918	-88.0878	23447	4
Tinley Park	IL	Illinois	41.5738	-87.8039	52259	4
East Chicago	IN	Indiana	41.6389	-87.4621	32504	4
Michigan City	IN	Indiana	41.7094	-86.8869	32794	4
Lebanon	IN	Indiana	40.0521	-86.4716	14856	4
Campbellsville	KY	Kentucky	37.346	-85.3454	10369	4
Montgomery	OH	Ohio	39.2474	-84.3476	9962	4
Oxford	OH	Ohio	39.5075	-84.7466	22702	4
Huntington	IN	Indiana	40.8821	-85.4956	17187	4
Beavercreek	OH	Ohio	39.7294	-84.0623	41935	4
Marion	OH	Ohio	40.5866	-83.1264	37285	4
Westerville	OH	Ohio	40.1235	-82.9214	36998	4
Amherst	OH	Ohio	41.4	-82.2262	12190	4
Lorain	OH	Ohio	41.4482	-82.1689	69138	4
North Olmsted	OH	Ohio	41.4151	-81.9144	32751	4
Berea	OH	Ohio	41.37	-81.8626	18182	4
Wooster	OH	Ohio	40.8093	-81.9373	25593	4
Ravenna	OH	Ohio	41.1587	-81.2433	11776	4
Wheeling	WV	West Virginia	40.0703	-80.6986	29564	4
Ross	PA	Pennsylvania	40.5264	-80.0218	31164	4
Scott	PA	Pennsylvania	40.3915	-80.0797	16736	4
Kingsport	TN	Tennessee	36.5369	-82.5421	45374	4
Ashland	KY	Kentucky	38.464	-82.6416	20791	4
Sumter	SC	South Carolina	33.9269	-80.3635	38994	4
Fayetteville	GA	Georgia	33.4479	-84.4618	13839	4
Tucker	GA	Georgia	33.8517	-84.2215	27958	4
Indian Trail	NC	North Carolina	35.0699	-80.6544	21881	4
Evans	GA	Georgia	33.5111	-82.1399	22442	4
Hilton Head Island	SC	South Carolina	32.1788	-80.7429	39554	4
Henderson	NC	North Carolina	36.3248	-78.4085	16359	4
Hopewell	VA	Virginia	37.2904	-77.3034	22622	4
Oil City	PA	Pennsylvania	41.4283	-79.7073	11078	4
Warren	PA	Pennsylvania	41.8441	-79.1424	9652	4
Harrison	PA	Pennsylvania	40.6268	-79.7248	10479	4
Chambersburg	PA	Pennsylvania	39.9348	-77.6564	18762	4
Columbia	PA	Pennsylvania	40.0332	-76.4968	10315	4
Collingswood	NJ	New Jersey	39.9161	-75.0747	14101	4
Springfield	PA	Pennsylvania	39.927	-75.3352	23691	4
Pottstown	PA	Pennsylvania	40.2497	-75.6403	22248	4
Phoenixville	PA	Pennsylvania	40.1308	-75.5191	16316	4
South River	NJ	New Jersey	40.4444	-74.3818	16411	4
Highland Park	NJ	New Jersey	40.5003	-74.4257	14562	4
Browns Mills	NJ	New Jersey	39.9793	-74.5718	11551	4
Hammonton	NJ	New Jersey	39.6412	-74.7862	14054	4
Vineland	NJ	New Jersey	39.4804	-75.014	59249	4
Williamstown	NJ	New Jersey	39.6864	-74.9915	13301	4
Olney	MD	Maryland	39.153	-77.0747	33563	4
New Carrollton	MD	Maryland	38.9664	-76.8766	12712	4
Crofton	MD	Maryland	39.0089	-76.681	20795	4
Pasadena	MD	Maryland	39.1128	-76.5519	12751	4
Haverstraw	NY	New York	41.1965	-73.9668	10912	4
New Cassel	NY	New York	40.7607	-73.5667	13339	4
East Northport	NY	New York	40.8792	-73.3241	21249	4
East Islip	NY	New York	40.7319	-73.1851	14370	4
Mastic	NY	New York	40.8021	-72.844	16812	4
Taunton	MA	Massachusetts	41.9015	-71.0936	58012	4
Kaneohe	HI	Hawaii	21.406	-157.796	34803	3
Twin Falls	ID	Idaho	42.5614	-114.464	38806	3
Grants Pass	OR	Oregon	42.439	-123.328	24753	3
Springfield	OR	Oregon	44.0531	-122.991	55550	3
Aberdeen	WA	Washington	46.9758	-123.819	16567	3
Bremerton	WA	Washington	47.57	-122.653	36981	3
St Helens	OR	Oregon	45.8594	-122.817	11888	3
Longview	WA	Washington	46.1427	-122.956	35818	3
McMinnville	OR	Oregon	45.2118	-123.197	29744	3
Tigard	OR	Oregon	45.4276	-122.779	46046	3
Lake Oswego	OR	Oregon	45.4131	-122.697	36764	3
Richland	WA	Washington	46.2797	-119.281	45277	3
Monroe	WA	Washington	47.8577	-121.988	15766	3
Ontario	OR	Oregon	44.0268	-116.969	10989	3
Meridian	ID	Idaho	43.6142	-116.399	50773	3
El Dorado Hills	CA	California	38.6882	-121.078	27781	3
Hanford	CA	California	36.3333	-119.647	49331	3
Half Moon Bay	CA	California	37.4588	-122.437	12356	3
Alameda	CA	California	37.764	-122.257	72644	3
San Bruno	CA	California	37.6253	-122.425	40859	3
Castro Valley	CA	California	37.7038	-122.079	57638	3
San Lorenzo	CA	California	37.6752	-122.134	21929	3
Cupertino	CA	California	37.3175	-122.042	51941	3
Seaside	CA	California	36.6158	-121.834	34493	3
Madera	CA	California	36.9634	-120.067	53592	3
Ramona	CA	California	33.0359	-116.871	16380	3
Dana Point	CA	California	33.4722	-117.693	36884	3
Escondido	CA	California	33.1248	-117.081	141940	3
Lake Los Angeles	CA	California	34.6177	-117.834	11900	3
Palmdale	CA	California	34.581	-118.101	140041	3
Camarillo	CA	California	34.2256	-119.032	65291	3
Hawthorne	CA	California	33.9172	-118.349	88428	3
Cerritos	CA	California	33.8683	-118.068	53097	3
Santa Fe Springs	CA	California	33.9374	-118.067	17128	3
Westminster	CA	California	33.7514	-117.994	93035	3
Garden Grove	CA	California	33.7788	-117.96	173540	3
Buena Park	CA	California	33.8562	-118.004	81905	3
La Mirada	CA	California	33.9021	-118.01	48441	3
Gallup	NM	New Mexico	35.5238	-108.734	20178	3
Peoria	AZ	Arizona	33.6497	-112.252	139804	3
Farmington	NM	New Mexico	36.7515	-108.19	41191	3
Paradise Valley	AZ	Arizona	33.5446	-111.956	14358	3
West Valley City	UT	Utah	40.6892	-111.994	118093	3
Bountiful	UT	Utah	40.8796	-111.872	43709	3
South Jordan	UT	Utah	40.5616	-111.961	40457	3
Scottsbluff	NE	Nebraska	41.8671	-103.661	14616	3
Castle Rock	CO	Colorado	39.3808	-104.851	36769	3
Las Vegas	NM	New Mexico	35.597	-105.223	13842	3
The Village	OK	Oklahoma	35.5687	-97.5566	10705	3
Yukon	OK	Oklahoma	35.5023	-97.7491	22722	3
Gainesville	TX	Texas	33.6304	-97.1403	16479	3
Keller	TX	Texas	32.9275	-97.236	38611	3
Cedar Hill	TX	Texas	32.5885	-96.9473	40597	3
Fort Hood	TX	Texas	31.1301	-97.7803	35052	3
Belton	TX	Texas	31.0589	-97.4634	15561	3
Garden City	KS	Kansas	37.9753	-100.864	28074	3
Salina	KS	Kansas	38.8243	-97.6072	46458	3
Carthage	MO	Missouri	37.1678	-94.315	13228	3
Pittsburg	KS	Kansas	37.4103	-94.6998	19201	3
Leavenworth	KS	Kansas	39.3082	-94.9227	37972	3
Marshalltown	IA	Iowa	42.0417	-92.9146	26483	3
Athens	TX	Texas	32.2028	-95.8491	12253	3
Palestine	TX	Texas	31.7579	-95.6385	18005	3
Nacogdoches	TX	Texas	31.6089	-94.6509	31269	3
Ada	OK	Oklahoma	34.7637	-96.6682	16203	3
Broken Arrow	OK	Oklahoma	36.0363	-95.7836	82115	3
Tahlequah	OK	Oklahoma	35.9129	-94.9715	15714	3
Seguin	TX	Texas	29.5743	-97.9653	22796	3
New Braunfels	TX	Texas	29.7017	-98.1236	46088	3
San Juan	TX	Texas	26.1925	-98.1527	30047	3
Conroe	TX	Texas	30.3161	-95.4588	43821	3
Richmond	TX	Texas	29.5809	-95.763	13813	3
Humble	TX	Texas	29.9949	-95.2649	16913	3
Alvin	TX	Texas	29.3937	-95.2716	22919	3
New Iberia	LA	Louisiana	30.0036	-91.8185	32618	3
Abbeville	LA	Louisiana	29.9725	-92.1291	12043	3
Zachary	LA	Louisiana	30.6551	-91.1568	12454	3
Gillette	WY	Wyoming	44.2827	-105.505	21546	3
Maple Grove	MN	Minnesota	45.1111	-93.4519	56886	3
Hopkins	MN	Minnesota	44.9267	-93.4055	17741	3
Brooklyn Park	MN	Minnesota	45.1014	-93.3474	71600	3
Woodbury	MN	Minnesota	44.9201	-92.9354	58515	3
Owatonna	MN	Minnesota	44.0872	-93.2246	25088	3
Mason City	IA	Iowa	43.1487	-93.2019	28458	3
Lakeville	MN	Minnesota	44.6919	-93.2447	54799	3
Merrill	WI	Wisconsin	45.1826	-89.6956	10181	3
Watertown	WI	Wisconsin	43.1931	-88.7238	22995	3
Barrington	IL	Illinois	42.1535	-88.1319	10375	3
Palatine	IL	Illinois	42.1169	-88.0406	66567	3
Buffalo Grove	IL	Illinois	42.1663	-87.9634	43444	3
Glenview	IL	Illinois	42.0794	-87.8156	45135	3
Wilmette	IL	Illinois	42.0772	-87.7237	26684	3
Germantown	WI	Wisconsin	43.2232	-88.1204	20324	3
Owosso	MI	Michigan	42.9961	-84.1745	15890	3
Beverly Hills	MI	Michigan	42.5246	-83.2331	10289	3
Madison Heights	MI	Michigan	42.5014	-83.1047	30800	3
Harrison	MI	Michigan	42.5837	-82.8292	26229	3
St Clair Shores	MI	Michigan	42.4878	-82.8968	63306	3
Dunkirk	NY	New York	42.483	-79.3298	12558	3
West Seneca	NY	New York	42.8391	-78.7609	45403	3
Chicopee	MA	Massachusetts	42.1702	-72.5886	54623	3
Woburn	MA	Massachusetts	42.4845	-71.1521	37925	3
Needham	MA	Massachusetts	42.2859	-71.2327	28888	3
Swampscott	MA	Massachusetts	42.4744	-70.9059	14532	3
Danvers	MA	Massachusetts	42.5698	-70.9432	27944	3
Braintree	MA	Massachusetts	42.2096	-70.9997	34575	3
Weymouth	MA	Massachusetts	42.2065	-70.9459	54894	3
Biddeford	ME	Maine	43.4741	-70.4462	22008	3
Fort Walton Beach	FL	Florida	30.4202	-86.6167	20277	3
Eustis	FL	Florida	28.851	-81.6819	17642	3
Ocoee	FL	Florida	28.5741	-81.5306	31031	3
Altamonte Springs	FL	Florida	28.6615	-81.392	44131	3
Fort Pierce	FL	Florida	27.4388	-80.3355	41401	3
Punta Gorda	FL	Florida	26.9159	-82.0478	16956	3
Lake Wales	FL	Florida	27.9047	-81.584	11471	3
Plant City	FL	Florida	28.0143	-82.1289	33328	3
Palm City	FL	Florida	27.1711	-80.2787	22815	3
North Palm Beach	FL	Florida	26.8182	-80.0637	13142	3
Tamarac	FL	Florida	26.2036	-80.2464	61652	3
Deerfield Beach	FL	Florida	26.3052	-80.1198	67541	3
Coconut Creek	FL	Florida	26.275	-80.1847	48934	3
Palm Springs	FL	Florida	26.6397	-80.0951	12123	3
Doral	FL	Florida	25.8081	-80.3533	35788	3
Miami Lakes	FL	Florida	25.9117	-80.3251	27304	3
Westchester	FL	Florida	25.747	-80.3369	30348	3
Greenwood	MS	Mississippi	33.5187	-90.1839	18139	3
Columbus	MS	Mississippi	33.5018	-88.4151	25318	3
Brandon	MS	Mississippi	32.2803	-89.9985	19802	3
Cleveland	MS	Mississippi	33.742	-90.7265	13377	3
Florence	AL	Alabama	34.8203	-87.6629	36064	3
Athens	AL	Alabama	34.7896	-86.9694	20155	3
Goodlettsville	TN	Tennessee	36.327	-86.7043	14838	3
Alabaster	AL	Alabama	33.2312	-86.8238	28385	3
Warsaw	IN	Indiana	41.2406	-85.847	12801	3
Ferguson	MO	Missouri	38.7457	-90.2966	21894	3
University City	MO	Missouri	38.6639	-90.3282	36592	3
Belleville	IL	Illinois	38.5216	-89.9952	41302	3
Paducah	KY	Kentucky	37.0722	-88.6274	25278	3
Galesburg	IL	Illinois	40.9523	-90.3685	32516	3
Ottawa	IL	Illinois	41.3471	-88.8422	18724	3
Moline	IL	Illinois	41.491	-90.502	43347	3
Bettendorf	IA	Iowa	41.55	-90.4937	32820	3
East Peoria	IL	Illinois	40.6691	-89.5455	22735	3
DeKalb	IL	Illinois	41.9313	-88.7502	44395	3
Morris	IL	Illinois	41.3647	-88.4261	12542	3
Terre Haute	IN	Indiana	39.4696	-87.3898	59475	3
Niles	IL	Illinois	42.0323	-87.8169	29944	3
Lincolnwood	IL	Illinois	42.0053	-87.7343	11889	3
Cicero	IL	Illinois	41.8452	-87.7599	88256	3
Mishawaka	IN	Indiana	41.6675	-86.1713	46511	3
Niles	MI	Michigan	41.8303	-86.2508	12128	3
Plainfield	IN	Indiana	39.6975	-86.3847	21607	3
Speedway	IN	Indiana	39.7919	-86.25	12545	3
Noblesville	IN	Indiana	40.0499	-86.0215	38462	3
Murray	KY	Kentucky	36.6095	-88.3157	14947	3
Hopkinsville	KY	Kentucky	36.8547	-87.4889	29376	3
Jeffersonville	IN	Indiana	38.2957	-85.7315	29148	3
Danville	KY	Kentucky	37.6455	-84.775	15922	3
Blue Ash	OH	Ohio	39.2471	-84.376	11804	3
Covington	KY	Kentucky	39.0651	-84.5096	42878	3
Shiloh	OH	Ohio	39.8087	-84.2253	10896	3
Perrysburg	OH	Ohio	41.5502	-83.6299	19249	3
Findlay	OH	Ohio	41.0428	-83.6422	40757	3
Tiffin	OH	Ohio	41.1168	-83.179	17746	3
Fairborn	OH	Ohio	39.8079	-84.022	33117	3
Lancaster	OH	Ohio	39.7193	-82.6053	37898	3
Elyria	OH	Ohio	41.3734	-82.1017	56286	3
Richmond Heights	OH	Ohio	41.5582	-81.5037	10770	3
Mayfield Heights	OH	Ohio	41.5174	-81.4559	18398	3
Strongsville	OH	Ohio	41.3128	-81.832	44033	3
Twinsburg	OH	Ohio	41.3241	-81.4527	18468	3
Massillon	OH	Ohio	40.7953	-81.5229	31295	3
Boardman	OH	Ohio	41.039	-80.6654	36008	3
Clarksburg	WV	West Virginia	39.2834	-80.3369	16314	3
Robinson	PA	Pennsylvania	40.458	-80.1283	12170	3
Monroe	NC	North Carolina	34.9888	-80.5498	31543	3
Newnan	GA	Georgia	33.3764	-84.7886	20899	3
Smyrna	GA	Georgia	33.8719	-84.5184	45576	3
Athens	TN	Tennessee	35.4482	-84.6021	13569	3
Cleveland	TN	Tennessee	35.1715	-84.8711	39290	3
Farragut	TN	Tennessee	35.8775	-84.1735	20081	3
Lawrenceville	GA	Georgia	33.9531	-83.9925	31939	3
Snellville	GA	Georgia	33.8584	-84.0063	19056	3
Greenwood	SC	South Carolina	34.1898	-82.1548	22606	3
Simpsonville	SC	South Carolina	34.7334	-82.26	15799	3
Morganton	NC	North Carolina	35.7426	-81.6924	17146	3
Lenoir	NC	North Carolina	35.9084	-81.53	16920	3
Shelby	NC	North Carolina	35.2883	-81.5378	19504	3
Lexington	NC	North Carolina	35.8168	-80.2586	20065	3
Gastonia	NC	North Carolina	35.2552	-81.1802	67913	3
Mint Hill	NC	North Carolina	35.1802	-80.6644	17071	3
Goose Creek	SC	South Carolina	32.9955	-80.0289	31749	3
Laurinburg	NC	North Carolina	34.7647	-79.4701	16531	3
Apex	NC	North Carolina	35.732	-78.8529	29288	3
Conway	SC	South Carolina	33.8381	-79.0561	12460	3
Fort Bragg	NC	North Carolina	35.1391	-78.9991	29456	3
Goldsboro	NC	North Carolina	35.382	-77.978	37722	3
Elizabeth City	NC	North Carolina	36.2956	-76.225	18544	3
Staunton	VA	Virginia	38.1579	-79.0764	23469	3
Eden	NC	North Carolina	36.5064	-79.7451	15818	3
Montclair	VA	Virginia	38.6159	-77.343	20480	3
Centreville	VA	Virginia	38.8425	-77.4426	53140	3
Chester	VA	Virginia	37.3534	-77.4358	21051	3
Glen Allen	VA	Virginia	37.6601	-77.4856	14037	3
Butler	PA	Pennsylvania	40.8607	-79.8948	15063	3
Uniontown	PA	Pennsylvania	39.9	-79.7245	12111	3
Dundalk	MD	Maryland	39.266	-76.5052	63154	3
Ellicott City	MD	Maryland	39.2693	-76.8305	63120	3
Randallstown	MD	Maryland	39.3753	-76.7966	33446	3
Cockeysville	MD	Maryland	39.4733	-76.6267	19693	3
Bel Air	MD	Maryland	39.5367	-76.3483	11057	3
Hazleton	PA	Pennsylvania	40.9588	-75.9745	22232	3
Bloomsburg	PA	Pennsylvania	41.0006	-76.4539	13351	3
Bridgeton	NJ	New Jersey	39.4296	-75.2305	23598	3
Cherry Hill Mall	NJ	New Jersey	39.9404	-75.0122	13898	3
Echelon	NJ	New Jersey	39.8482	-74.9995	10925	3
Friendly	MD	Maryland	38.7501	-76.9743	12321	3
Colesville	MD	Maryland	39.0797	-77.0033	20728	3
Keansburg	NJ	New Jersey	40.4473	-74.1312	10734	3
Morganville	NJ	New Jersey	40.3363	-74.2914	11706	3
Wanaque	NJ	New Jersey	41.0396	-74.2893	11332	3
Franklin Lakes	NJ	New Jersey	41.0104	-74.2085	10879	3
Stony Point	NY	New York	41.2264	-73.9929	12405	3
Greenlawn	NY	New York	40.8576	-73.3659	13611	3
North Merrick	NY	New York	40.6857	-73.5581	11810	3
North Amityville	NY	New York	40.7001	-73.4128	17577	3
Massapequa Park	NY	New York	40.6845	-73.4495	17418	3
Mastic Beach	NY	New York	40.7613	-72.8464	12337	3
Rocky Point	NY	New York	40.9537	-72.9273	11312	3
Longmeadow	MA	Massachusetts	42.0504	-72.5712	15671	3
Barrington	RI	Rhode Island	41.7452	-71.3182	17142	3
Woonsocket	RI	Rhode Island	42.0017	-71.5072	44203	3
Gresham	OR	Oregon	45.5037	-122.439	98272	2
Albany	OR	Oregon	44.6302	-123.096	44957	2
Federal Way	WA	Washington	47.313	-122.339	85594	2
Newberg	OR	Oregon	45.305	-122.967	20494	2
Woodburn	OR	Oregon	45.1473	-122.858	23952	2
Tualatin	OR	Oregon	45.3748	-122.77	25765	2
Lynnwood	WA	Washington	47.8279	-122.305	35858	2
Caldwell	ID	Idaho	43.6582	-116.68	33073	2
Soledad	CA	California	36.4332	-121.33	26973	2
Paso Robles	CA	California	35.627	-120.678	29073	2
Lindsay	CA	California	36.2072	-119.089	11404	2
Pacific Grove	CA	California	36.6191	-121.921	15321	2
Live Oak	CA	California	36.9814	-121.98	16944	2
Healdsburg	CA	California	38.6176	-122.866	11680	2
Daly City	CA	California	37.6907	-122.466	105556	2
East Palo Alto	CA	California	37.467	-122.14	31153	2
Oroville	CA	California	39.5087	-121.555	13779	2
Watsonville	CA	California	36.9201	-121.764	49371	2
Oakdale	CA	California	37.7692	-120.857	18964	2
Brentwood	CA	California	37.9353	-121.71	41351	2
West Sacramento	CA	California	38.5711	-121.539	44275	2
Lincoln	CA	California	38.8871	-121.296	17581	2
El Cajon	CA	California	32.7983	-116.96	95567	2
Laguna Niguel	CA	California	33.5319	-117.702	65504	2
Lemon Grove	CA	California	32.7335	-117.034	24934	2
Rancho Santa Margarita	CA	California	33.6415	-117.595	51070	2
Fallbrook	CA	California	33.3717	-117.236	31798	2
Moorpark	CA	California	34.2811	-118.874	36173	2
Rancho Palos Verdes	CA	California	33.7582	-118.364	42624	2
Seal Beach	CA	California	33.7593	-118.082	24899	2
Arcadia	CA	California	34.1327	-118.036	55241	2
Sierra Madre	CA	California	34.1648	-118.051	11020	2
Alhambra	CA	California	34.0819	-118.135	89383	2
Brea	CA	California	33.9233	-117.889	38431	2
Whittier	CA	California	33.9657	-118.024	87345	2
Tehachapi	CA	California	35.1286	-118.449	12236	2
Upland	CA	California	34.1133	-117.658	76629	2
Foothill Ranch	CA	California	33.6885	-117.664	11368	2
Perris	CA	California	33.7966	-117.224	53740	2
Hemet	CA	California	33.742	-116.983	70705	2
Yucca Valley	CA	California	34.126	-116.416	20578	2
La Quinta	CA	California	33.6754	-116.297	39071	2
Bullhead City	AZ	Arizona	35.1156	-114.589	45844	2
Spring Valley	NV	Nevada	36.1125	-115.25	175535	2
Blythe	CA	California	33.6172	-114.589	13099	2
Portales	NM	New Mexico	34.1822	-103.339	11407	2
Apache Junction	AZ	Arizona	33.411	-111.548	31382	2
Fountain Hills	AZ	Arizona	33.6048	-111.729	24107	2
Rock Springs	WY	Wyoming	41.5909	-109.222	19318	2
Millcreek	UT	Utah	40.6862	-111.864	30659	2
Louisville	CO	Colorado	39.976	-105.144	18605	2
Arvada	CO	Colorado	39.82	-105.111	101818	2
Lafayette	CO	Colorado	39.9951	-105.101	23881	2
Brighton	CO	Colorado	39.9742	-104.81	28756	2
Thornton	CO	Colorado	39.903	-104.954	99857	2
Black Forest	CO	Colorado	39.0366	-104.678	18673	2
Hobbs	NM	New Mexico	32.7122	-103.141	29096	2
Sweetwater	TX	Texas	32.4681	-100.407	10924	2
Altus	OK	Oklahoma	34.6438	-99.3266	20355	2
El Reno	OK	Oklahoma	35.5303	-97.9575	16084	2
Stephenville	TX	Texas	32.2202	-98.2136	15536	2
Highland Village	TX	Texas	33.0879	-97.0559	14944	2
Burleson	TX	Texas	32.5359	-97.3273	30172	2
Farmers Branch	TX	Texas	32.9289	-96.8775	27449	2
Lexington	NE	Nebraska	40.7794	-99.7439	10590	2
Hays	KS	Kansas	38.8794	-99.3223	19702	2
El Dorado	KS	Kansas	37.8211	-96.8583	12091	2
Shawnee	KS	Kansas	39.0128	-94.7658	59088	2
Prairie Village	KS	Kansas	38.9897	-94.6362	22068	2
Liberty	MO	Missouri	39.2409	-94.4265	27958	2
Maryville	MO	Missouri	40.3454	-94.8712	10841	2
St Joseph	MO	Missouri	39.7579	-94.8365	74071	2
Council Bluffs	IA	Iowa	41.2537	-95.8624	60082	2
Ankeny	IA	Iowa	41.7268	-93.6043	32688	2
Urbandale	IA	Iowa	41.6364	-93.7361	36721	2
Hannibal	MO	Missouri	39.7041	-91.3774	17788	2
Marshall	MO	Missouri	39.1162	-93.1979	12369	2
Lebanon	MO	Missouri	37.6782	-92.6617	12978	2
Sulphur Springs	TX	Texas	33.1341	-95.602	14948	2
Lufkin	TX	Texas	31.3369	-94.7304	33308	2
Terrell	TX	Texas	32.7375	-96.2824	16557	2
Texarkana	AR	Arkansas	33.4331	-94.0205	28696	2
McAlester	OK	Oklahoma	34.933	-95.7664	18171	2
Owasso	OK	Oklahoma	36.2904	-95.8286	22843	2
Muskogee	OK	Oklahoma	35.7466	-95.368	39140	2
Van Buren	AR	Arkansas	35.4443	-94.3467	20816	2
Harrison	AR	Arkansas	36.2372	-93.1137	12518	2
Hot Springs	AR	Arkansas	34.4971	-93.0554	36981	2
North Little Rock	AR	Arkansas	34.7808	-92.2569	60386	2
West Monroe	LA	Louisiana	32.5108	-92.14	12897	2
Alexandria	LA	Louisiana	31.2928	-92.4592	46021	2
Camden	AR	Arkansas	33.5709	-92.8349	12598	2
El Dorado	AR	Arkansas	33.2135	-92.6626	20618	2
Harlingen	TX	Texas	26.1922	-97.6963	65665	2
San Marcos	TX	Texas	29.8794	-97.9388	40503	2
Kerrville	TX	Texas	30.0465	-99.1405	21383	2
Beeville	TX	Texas	28.4055	-97.7508	12868	2
Converse	TX	Texas	29.5173	-98.3138	14867	2
Cedar Park	TX	Texas	30.5066	-97.8303	37282	2
Alice	TX	Texas	27.7507	-98.0705	19468	2
Deer Park	TX	Texas	29.692	-95.1181	31408	2
Channelview	TX	Texas	29.7867	-95.1221	35890	2
Sulphur	LA	Louisiana	30.2304	-93.3608	20532	2
Sheridan	WY	Wyoming	44.7967	-106.959	16518	2
Moorhead	MN	Minnesota	46.8646	-96.7587	34932	2
West Fargo	ND	North Dakota	46.8717	-96.895	18434	2
Pierre	SD	South Dakota	44.368	-100.336	14169	2
Watertown	SD	South Dakota	44.9034	-97.1204	20467	2
Fort Dodge	IA	Iowa	42.5068	-94.1803	25798	2
Fergus Falls	MN	Minnesota	46.2828	-96.0732	13204	2
Menomonie	WI	Wisconsin	44.8793	-91.9183	15757	2
Anoka	MN	Minnesota	45.2029	-93.387	18421	2
Champlin	MN	Minnesota	45.1707	-93.3845	23525	2
Mounds View	MN	Minnesota	45.1047	-93.2062	12538	2
New Brighton	MN	Minnesota	45.0627	-93.2076	21946	2
Fond du Lac	WI	Wisconsin	43.7751	-88.4449	43300	2
Lindenhurst	IL	Illinois	42.4193	-88.0262	15116	2
Winnetka	IL	Illinois	42.1062	-87.738	12210	2
Franklin	WI	Wisconsin	42.8992	-88.0022	33044	2
Greenfield	WI	Wisconsin	42.963	-87.9959	35063	2
Wauwatosa	WI	Wisconsin	43.0589	-88.0262	46010	2
Grafton	WI	Wisconsin	43.3179	-87.9541	11220	2
De Pere	WI	Wisconsin	44.441	-88.0684	22482	2
Grandville	MI	Michigan	42.9039	-85.7574	16541	2
Holt	MI	Michigan	42.6382	-84.5219	11812	2
Okemos	MI	Michigan	42.7107	-84.4226	23153	2
Bay City	MI	Michigan	43.592	-83.8895	36047	2
Waterford	MI	Michigan	42.6601	-83.3797	73410	2
Bloomfield	MI	Michigan	42.5763	-83.267	42461	2
Clinton	MI	Michigan	42.5802	-82.9171	99726	2
Harper Woods	MI	Michigan	42.438	-82.925	13612	2
Leominster	MA	Massachusetts	42.5265	-71.7536	42847	2
Gloucester	MA	Massachusetts	42.624	-70.6755	31111	2
Wilmington	MA	Massachusetts	42.5586	-71.1703	21403	2
Hudson	MA	Massachusetts	42.3923	-71.5656	15016	2
Malden	MA	Massachusetts	42.4285	-71.0606	57440	2
Everett	MA	Massachusetts	42.4099	-71.0522	38352	2
Dedham	MA	Massachusetts	42.2446	-71.1655	23597	2
Randolph	MA	Massachusetts	42.1734	-71.0491	31000	2
Daphne	AL	Alabama	30.6313	-87.8864	19838	2
Houma	LA	Louisiana	29.5876	-90.7161	35224	2
Callaway	FL	Florida	30.1423	-85.5777	14556	2
Lady Lake	FL	Florida	28.9292	-81.9309	15040	2
Land O Lakes	FL	Florida	28.2039	-82.4488	30117	2
Haines City	FL	Florida	28.1118	-81.6286	15849	2
St Cloud	FL	Florida	28.2466	-81.2875	28458	2
Titusville	FL	Florida	28.5912	-80.8199	45168	2
Oviedo	FL	Florida	28.6596	-81.1958	33973	2
Merritt Island	FL	Florida	28.3579	-80.6847	38870	2
Edgewater	FL	Florida	28.9639	-80.9048	21558	2
Sebastian	FL	Florida	27.7828	-80.4824	21138	2
Palmetto	FL	Florida	27.5221	-82.5784	14180	2
Pinellas Park	FL	Florida	27.8523	-82.7071	46670	2
Port St Lucie	FL	Florida	27.2758	-80.355	151276	2
Dania Beach	FL	Florida	26.0549	-80.1531	21222	2
Princeton	FL	Florida	25.5356	-80.3975	16947	2
Miramar	FL	Florida	25.9788	-80.2825	111858	2
Starkville	MS	Mississippi	33.4625	-88.82	22391	2
Canton	MS	Mississippi	32.612	-90.0316	13983	2
Horn Lake	MS	Mississippi	34.9586	-90.0429	17834	2
Dickson	TN	Tennessee	36.0715	-87.3745	13135	2
Muscle Shoals	AL	Alabama	34.7508	-87.6503	12222	2
Lebanon	TN	Tennessee	36.208	-86.3263	23560	2
Hendersonville	TN	Tennessee	36.3001	-86.6061	46110	2
Fort Payne	AL	Alabama	34.4538	-85.7066	13464	2
Scottsboro	AL	Alabama	34.6514	-86.0426	14459	2
Bessemer	AL	Alabama	33.3913	-86.9566	29074	2
Overland	MO	Missouri	38.6991	-90.3678	16271	2
Marion	IL	Illinois	37.7304	-88.9302	16957	2
Sterling	IL	Illinois	41.7968	-89.6933	15300	2
Mattoon	IL	Illinois	39.4789	-88.3731	17684	2
Warrenville	IL	Illinois	41.8263	-88.1895	13916	2
West Chicago	IL	Illinois	41.8884	-88.2097	25901	2
St Charles	IL	Illinois	41.9137	-88.3108	33843	2
Carol Stream	IL	Illinois	41.922	-88.1408	42386	2
Wheaton	IL	Illinois	41.8596	-88.1072	55580	2
Schiller Park	IL	Illinois	41.9562	-87.8704	12120	2
River Forest	IL	Illinois	41.893	-87.8172	11435	2
Berwyn	IL	Illinois	41.8425	-87.7899	54512	2
Forest Park	IL	Illinois	41.873	-87.8112	15657	2
Hinsdale	IL	Illinois	41.8006	-87.9283	17497	2
Lyons	IL	Illinois	41.8133	-87.8218	10290	2
Bridgeview	IL	Illinois	41.7424	-87.8068	15257	2
Blue Island	IL	Illinois	41.6584	-87.6794	23446	2
Oak Forest	IL	Illinois	41.6076	-87.7506	28094	2
Harvey	IL	Illinois	41.6109	-87.6519	29330	2
Homewood	IL	Illinois	41.558	-87.6626	18968	2
Park Forest	IL	Illinois	41.484	-87.6871	23650	2
Griffith	IN	Indiana	41.5308	-87.4258	17330	2
Lansing	IL	Illinois	41.5658	-87.5458	28214	2
Elkhart	IN	Indiana	41.6831	-85.9688	54353	2
Martinsville	IN	Indiana	39.4233	-86.4238	11910	2
Henderson	KY	Kentucky	37.8356	-87.5807	27461	2
New Albany	IN	Indiana	38.3019	-85.8214	36941	2
Nicholasville	KY	Kentucky	37.8827	-84.5766	24077	2
Richmond	KY	Kentucky	37.7447	-84.2936	29406	2
Portsmouth	OH	Ohio	38.7432	-82.9654	19507	2
Sidney	OH	Ohio	40.2897	-84.161	20766	2
New Castle	IN	Indiana	39.9237	-85.365	17294	2
Miamisburg	OH	Ohio	39.6385	-84.2753	19819	2
Clayton	OH	Ohio	39.8515	-84.3112	12970	2
Trotwood	OH	Ohio	39.7948	-84.2899	26770	2
Adrian	MI	Michigan	41.8965	-84.0378	22132	2
Fremont	OH	Ohio	41.3489	-83.1171	16856	2
Zanesville	OH	Ohio	39.946	-82.0121	25134	2
Ashtabula	OH	Ohio	41.8771	-80.797	20746	2
Meadville	PA	Pennsylvania	41.6421	-80.1474	13482	2
Parkersburg	WV	West Virginia	39.2662	-81.5421	32199	2
Ashland	OH	Ohio	40.867	-82.3151	21471	2
Parma	OH	Ohio	41.3919	-81.7285	81313	2
Eastlake	OH	Ohio	41.661	-81.4354	20129	2
Solon	OH	Ohio	41.3899	-81.4423	22151	2
Aurora	OH	Ohio	41.3193	-81.3559	15213	2
Stow	OH	Ohio	41.1766	-81.4362	34554	2
New Castle	PA	Pennsylvania	40.9973	-80.3446	24975	2
Hermitage	PA	Pennsylvania	41.2325	-80.4605	16917	2
East Liverpool	OH	Ohio	40.6285	-80.5691	12559	2
Beckley	WV	West Virginia	37.7798	-81.1832	16966	2
Milledgeville	GA	Georgia	33.0878	-83.2334	19606	2
Warner Robins	GA	Georgia	32.6087	-83.638	53629	2
Dublin	GA	Georgia	32.5375	-82.9184	16435	2
Tifton	GA	Georgia	31.4634	-83.5101	15732	2
Peachtree City	GA	Georgia	33.399	-84.5706	36575	2
College Park	GA	Georgia	33.6482	-84.456	21756	2
Calhoun	GA	Georgia	34.4999	-84.9426	13118	2
Dalton	GA	Georgia	34.7711	-84.9716	32240	2
Cartersville	GA	Georgia	34.1764	-84.8039	19308	2
Sevierville	TN	Tennessee	35.8776	-83.5699	13189	2
Newberry	SC	South Carolina	34.2777	-81.6166	10584	2
Parker	SC	South Carolina	34.8536	-82.4398	10833	2
Hendersonville	NC	North Carolina	35.3206	-82.4616	11296	2
Elizabethton	TN	Tennessee	36.3365	-82.239	14393	2
Thomasville	NC	North Carolina	35.8858	-80.0773	20974	2
Matthews	NC	North Carolina	35.1169	-80.7164	25929	2
Cornelius	NC	North Carolina	35.479	-80.8845	18083	2
Fort Stewart	GA	Georgia	31.8799	-81.6074	12011	2
Summerville	SC	South Carolina	33.0082	-80.1829	32928	2
Georgetown	GA	Georgia	31.9796	-81.2321	11908	2
Garner	NC	North Carolina	35.6982	-78.6229	20984	2
Rocky Mount	NC	North Carolina	35.9541	-77.8056	56613	2
Waynesboro	VA	Virginia	38.0699	-78.8945	20763	2
Newington	VA	Virginia	38.7354	-77.2036	20689	2
Germantown	MD	Maryland	39.1782	-77.2617	59422	2
Annandale	VA	Virginia	38.8341	-77.2113	56345	2
Mechanicsville	VA	Virginia	37.6192	-77.355	35092	2
Hampton	PA	Pennsylvania	40.5831	-79.9566	17538	2
Murrysville	PA	Pennsylvania	40.4348	-79.6567	19286	2
Jeannette	PA	Pennsylvania	40.3288	-79.614	10146	2
West Mifflin	PA	Pennsylvania	40.3681	-79.8976	21528	2
Ephrata	PA	Pennsylvania	40.1807	-76.1824	13990	2
Lebanon	PA	Pennsylvania	40.3415	-76.4209	25107	2
Coatesville	PA	Pennsylvania	39.9836	-75.8166	12340	2
Westminster	MD	Maryland	39.5766	-77.0001	19295	2
Catonsville	MD	Maryland	39.2738	-76.738	40666	2
Elizabethtown	PA	Pennsylvania	40.1532	-76.6004	12062	2
Edgewood	MD	Maryland	39.4303	-76.3056	25944	2
Pennsville	NJ	New Jersey	39.656	-75.5171	11982	2
Darby	PA	Pennsylvania	39.9183	-75.2584	10193	2
Radnor	PA	Pennsylvania	40.0334	-75.3718	31164	2
Norristown	PA	Pennsylvania	40.1199	-75.3417	32602	2
Ardmore	PA	Pennsylvania	40.0014	-75.2952	12654	2
Levittown	PA	Pennsylvania	40.1541	-74.8498	54063	2
Pennsauken	NJ	New Jersey	39.9566	-75.0559	36443	2
North Plainfield	NJ	New Jersey	40.6227	-74.4358	22207	2
Lexington Park	MD	Maryland	38.2589	-76.4506	12779	2
North Bethesda	MD	Maryland	39.0371	-77.1191	41256	2
[truncated: 484 more rows]
